# Supplementary material for: Worldwide prevalence of obesity among firefighters: a systematic review protocol
Source: PubMed Central journal article supplement — BMJ Open. 2020 Jan 9;10(1):e031282. doi: 10.1136/bmjopen-2019-031282 (PMC6955470; doi:10.1136/bmjopen-2019-031282), 2020-01-09
Supplement: bmjopen-2019-031282.draft_revisions.pdf [file bmjopen-2019-031282.draft_revisions.pdf]

# BMJ Open

BMJ Open is committed to open peer review. As part of this commitment we make the peer review history of every article we publish publicly available.

When an article is published we post the peer reviewers' comments and the authors' responses online. We also post the versions of the paper that were used during peer review. These are the versions that the peer review comments apply to.

The versions of the paper that follow are the versions that were submitted during the peer review process. They are not the versions of record or the final published versions. They should not be cited or distributed as the published version of this manuscript.

BMJ Open is an open access journal and the full, final, typeset and author-corrected version of record of the manuscript is available on our site with no access controls, subscription charges or pay-per-view fees (<http://bmjopen.bmj.com>).

If you have any questions on BMJ Open's open peer review process please email [editorial.bmjopen@bmj.com](mailto:editorial.bmjopen@bmj.com)

# BMJ Open

## Worldwide prevalence of obesity among firefighters: a systematic review protocol

|                               |                                                                                                                                                                                                                                                                                                                                                                                                                                                                                                                  |
|-------------------------------|------------------------------------------------------------------------------------------------------------------------------------------------------------------------------------------------------------------------------------------------------------------------------------------------------------------------------------------------------------------------------------------------------------------------------------------------------------------------------------------------------------------|
| Journal:                      | <i>BMJ Open</i>                                                                                                                                                                                                                                                                                                                                                                                                                                                                                                  |
| Manuscript ID                 | bmjopen-2019-031282                                                                                                                                                                                                                                                                                                                                                                                                                                                                                              |
| Article Type:                 | Protocol                                                                                                                                                                                                                                                                                                                                                                                                                                                                                                         |
| Date Submitted by the Author: | 25-Apr-2019                                                                                                                                                                                                                                                                                                                                                                                                                                                                                                      |
| Complete List of Authors:     | Melo Keene von Koenig Soares, Edgard; Universidade de Brasilia, Faculdade de Educação Física; Skidmore College, Health and Human Physiological Sciences/ First Responder Health and Safety Laboratory<br>Smith, Denise; Skidmore College, Health and Human Physiological Sciences/ First Responder Health and Safety Laboratory<br>Grossi Porto, Luiz Guilherme; Universidade de Brasilia, Faculdade de Educação Física; Harvard University T H Chan School of Public Health, Department of Environmental Health |
| Keywords:                     | Fire and Rescue Personnel, Abdominal Fat, Overweight                                                                                                                                                                                                                                                                                                                                                                                                                                                             |
|                               |                                                                                                                                                                                                                                                                                                                                                                                                                                                                                                                  |

SCHOLARONE™  
Manuscripts

1  
2  
3 **TITLE:** Worldwide prevalence of obesity among firefighters: a systematic review protocol  
4  
5  
6

7 **AUTHORS:** Edgard MKVK Soares<sup>1,2</sup>, Denise L Smith<sup>1</sup>, Luiz GG Porto<sup>2</sup>.  
8

9 1 – Health and Physiological Sciences, Skidmore College, Saratoga Springs-NY, USA  
10

11 2 – Faculdade de Educação Física, Universidade de Brasília, Brasília-DF, Brazil  
12

13 Corresponding author: Luiz GG Porto  
14  
15

16  
17  
18 **Corresponding author:** Prof. Luiz Guilherme Grossi Porto  
19

- 20 • **Address:** Campus Universitário Darcy Ribeiro
- 21
- 22 • **Brasília** – DF, Brazil – zip code: 70910-900
- 23
- 24 • **Phone:** +55 (61) 3107-2525; fax: +55 (61) 3107-2525
- 25
- 26 • **E-mail:** lgporto@hsph.harvard.edu/ luizggporto@gmail.com  
27

28  
29 **Word count:** 1,848  
30

31 **Number of Figures:** 1  
32

33 **Number of Tables:** 0  
34

35 **Number of References:** 44  
36

37 **Number of Supplementary Files:** 2  
38  
39  
40  
41  
42  
43  
44  
45  
46  
47  
48  
49  
50  
51  
52  
53  
54  
55  
56  
57  
58  
59  
60

## ABSTRACT

### Introduction

Obesity may interfere with job performance and increase the risk of injury during firefighting activity. Obesity also has many deleterious effects on health indices and is associated with higher all-cause mortality. Several studies have reported a high prevalence of obesity in the fire service. Possibly, this could be a reflection of the obesity prevalence in their original population. Also, firefighter's work routine (12-24 hour shifts) and food availability during night shifts may be related to weight gain during career. Studies in American firefighters have shown annual weight gain between 0.5-1.5 kg. This study aims to report the obesity prevalence in the fire service to describe how it varies based on country and region, job status, type of firefighter and gender.

### Methods and analysis

We will systematically search the literature databases PubMed, Medline, Web of Science and Sportdiscus. Two independent reviewers will search, screen, select studies and evaluate their methodological and reporting quality. One reviewer will extract data from eligible studies. The main outcome measured will be obesity prevalence. The results will be reported according to the Preferred Reporting Items for Systematic Reviews and Meta-Analyses statement. We plan to produce a narrative summary of our findings. Evidence tables will be generated to descriptively summarize the included studies and results.

### Ethics and dissemination

The systematic review does not require ethics clearance since published studies with non-identifiable data will be used. The results of the systematic review will be disseminated via publication in a peer-reviewed journal as well as through conference presentations

### Registration

This systematic review protocol has been registered at PROSPERO (CRD42019129122)

**Keywords**

Fire and Rescue Personnel, Abdominal Fat, Overweight

**ARTICLE SUMMARY****Strengths and limitations of this study**

- The first systematic review of worldwide obesity prevalence in firefighters.
- A comprehensive synthesis of worldwide obesity prevalence, including a narrative comparison with the country of origin of the study using a standardized risk of bias tool.
- Search, study selection and risk of bias assessment will be performed independently by two researchers, which will ensure that all relevant studies are included without personal biases.
- A potential limitation of this review may be a small number of studies available for countries other than United States.

## INTRODUCTION

1  
2  
3  
4  
5  
6  
7  
8  
9  
10  
11  
12  
13  
14  
15  
16  
17  
18  
19  
20  
21  
22  
23  
24  
25  
26  
27  
28  
29  
30  
31  
32  
33  
34  
35  
36  
37  
38  
39  
40  
41  
42  
43  
44  
45  
46  
47  
48  
49  
50  
51  
52  
53  
54  
55  
56  
57  
58  
59  
60

Firefighters perform critical public safety work public. Considering all the different occupational hazards firefighters face, it is surprising to many that the leading cause of duty-related death among United States (US) firefighters is sudden cardiac death (SCD). In 2017, SCD accounted for almost half of on-duty deaths in the US, and SCD has been responsible for about 43% of on duty fatalities for the last 10 years [1]. Furthermore, for every fatal on-duty cardiac event, there are an estimated 20 nonfatal on-duty cardiovascular events [2]. Theoretical models have been proposed in order to conceptualize how firefighters activities can result in a SCD [3–6].

Clearly, the underlying health of the firefighters is one of the important aspects associated with cardiovascular death in the fire service. Also, individual risk factors are critical factors in determining risk of SCD. Research has consistently found a highly prevalence of cardiovascular disease risk among FFs. Obesity increases the odds of a fatal on-duty coronary heart disease event by 1.5-6.6 times [7], and is highly associated with cardiomegaly in firefighters [8]. Studies report obesity prevalence in the US ranging from 22% [9] to 60% [10] depending on the region, time and type of firefighter (career or volunteer). Outside of the US, lower estimates of obesity have been reported. In Brazil, obesity rates of less than 15% have been reported for firefighters (who are members of the military)[11,12].

Obesity may interfere with job performance and increase the risk of injury during firefighting activity [13–15]. Obesity also has many deleterious effects on health indices, including: reduced arterial function [16,17], glucose intolerance, dyslipidemia, type 2 diabetes, hypertension, osteoarthritis [18], low cardiorespiratory fitness [19], pathological remodeling of the heart [20], endocrine disorders [21,22] and is associated with higher all-cause mortality [23].

Several studies in the US have reported that firefighter recruits begin their career with an elevated BMI [24,25]. In one study, conducted in Massachusetts, 33% of the recruits were obese [26]. Research has also shown that a significant weight gain occurs during a firefighters careers

1  
2  
3 [26,27]. A recent case-control study which retrospectively examined all available autopsy records  
4 of US fire fighters between 1999 and 2014 has shown obesity prevalence estimates as high as  
5 59.2% among cardiac cases and 47.7% among noncardiac trauma control cases [15].  
6  
7

8  
9 Firefighter's work routine (12-24 hour work shifts) added to lower availability of healthy  
10 food during night shifts may have an important contribution to weight gain [28] as shift-working by  
11 itself is considered an independent risk factor for obesity [29–31]. Some US cohort studies report  
12 firefighters annual weight gain ranging from 0.5 kg [32] to 1.5 kg [33]. Ide [27] reports similar  
13 values for Scottish Firefighters, with a mean gain of 1.5 kg/year. This could represent a gain of 5  
14 kg to 15 kg of weight in 10 years of service. Data from the Health Professionals Follow-Up Study  
15 show a significant weight gain of 0.2 kg every year [34], a considerably lower value compared to  
16 those in firefighters. These facts raise an interesting question, do firefighters have a high obesity  
17 prevalence because of the population of origin i.e. those who become firefighters (US population)  
18 have a large proportion of men with obesity, or does firefighting lead to obesity, or is it associated  
19 with the burden of their type of service.  
20  
21

22 Poston et al., [35] analyzed the obesity prevalence in 677 firefighters and compared them  
23 to the US adults. While prevalence was similar, in a separate analysis, volunteers seemed to  
24 possess a higher prevalence of obesity compared to US adults and career firefighters. Others  
25 studies show similarities between the firefighters and their original population [19,36], in contrast,  
26 German firefighters seem to be more fit than sedentary clerks and police officers from the same  
27 region [37]. Thus, this study aims to (1) report the obesity prevalence in the fire service (2) to  
28 describe how it varies based on country and region, job status, type of firefighter and gender.  
29  
30  
31

## 32 33 34 35 36 37 38 39 40 41 42 43 44 45 46 47 48 49 **Objectives**

50 The present studies intends to address the following issues:

- 51 • What is the prevalence of obesity among firefighters around the world?
  - 52 • Is the obesity prevalence among FF different from their own original population?
- 53  
54  
55  
56  
57  
58  
59

- Does the job status affect FF's obesity prevalence (volunteer, career, military)?
- Does the type of firefighter affect obesity prevalence (structural, wildland, industrial)?
- Does age have an important influence on obesity prevalence (recruits vs experienced)?
- Has obesity prevalence changed along the years in the Fire Service i.e. do older studies report an obesity prevalence different than the most recent ones?

## **METHODS AND ANALYSIS**

### **Protocol and registration**

The methods for this systematic review have been developed according to recommendations from the Preferred Reporting Items for Systematic Reviews and Meta-Analyses (PRISMA)[38] and Preferred Reporting Items for Systematic Review and Meta-Analysis Protocols (PRISMA-P)[39] statements. This protocol has been registered in the International Prospective Register of Systematic Reviews (PROSPERO) under the registration number CRD42019129122.

### **Search strategy**

The following electronic databases will be searched:

- PubMed
- Medline
- Web of Science
- Sportdiscus

We will search for studies reporting data on firefighter's BMI, BF% and obesity prevalence using the following terms:

- (Firefighter OR Firefighting) AND (obesity OR overweight OR weight OR excess weight OR adiposity or waist)

- (Firefighter OR Firefighting) AND (body and mass and index)
- (Firefighter OR Firefighting) AND (body and fat)

The only limit on the search will be time i.e. the day of the search. The search will be repeated before submitting the paper to a journal.

### **Eligibility criteria**

In order to be included this analysis, studies must report data from firefighters (FF) as a unique group. Data from other professionals (e.g. police officers) should constitute a different, separate group. Studies may have a cross-sectional or longitudinal design. If a study has multiple time points in the same cohort, we will use the most recent time point for the prevalence report, but will use other time points in order to address our last objective. Although we are not interested in interventions, interventions studies will also be included and pre-intervention data will be used instead of post. Data from men and women will be analyzed separately. We will include studies written in English, Portuguese and Spanish, from any year. Prevalence data must be calculated from body mass index, percentage body fat or waist circumference. The method employed to measure body fat percentage will also be recorded in order to account for possible differences among methods. Prevalence of obesity based on other variables will not be eligible for this analysis. To increase objectivity, reviewers will use a simple form to assess eligibility (Supplementary File 1).

### **Data extraction**

Two reviewers will independently perform the literature search and screen titles and abstracts for eligibility. Search results will be saved into a reference manager, duplicates will be eliminated using the provided software tools. Full texts will then be obtained for those who meet inclusion criteria or are uncertain. The full text will then be screened and reviewers will decide whether the paper meets all requirements for inclusion in the study. In order to avoid double

counting, when there are multiple studies from the same cohort, the study with the largest sample size will be used. If the sample size does not vary, the most recent paper will be used. We will also look for similarities (sample size, firefighter headquarter and mean age) between studies of the same author or group in order to ensure they are not the same sample. Authors will not be contacted in to obtain additional information, all necessary information should be reported in the manuscript. Reviewers will record the reasons for excluding studies. At the end of the independent assessment, results from the two reviewers will be shared. If discrepancies occur, they will be discussed between the two reviewers. If they cannot reach consensus, a senior author will resolve the differences. Investigators will not be blind to the journal titles or institutions or study authors.

One reviewer (EMKVKS) will use a standardized excel spreadsheet to extract and store data from the studies selected by the independent reviewers. In the remote possibility of any difficulties related to data extraction or storage, one of the senior authors (LGGP or DLS) will be contacted in order to solve the issue

Data of interest are presented in Table 1.

Table 1. Data of interest that will be sought from eligible studies

|                                       |                                                                                                                                 |
|---------------------------------------|---------------------------------------------------------------------------------------------------------------------------------|
| <b>Author details:</b>                | Name of first author, journal where the article was published, language and publication year.                                   |
| <b>Study characteristics:</b>         | Study design, sampling method, data collection period, and time of data collection (e.g. a 2016 study may have data from 2009). |
| <b>Participants' characteristics:</b> | Age, body mass index, body fat percentage and waist circumference.                                                              |
| <b>Firefighters' characteristics:</b> | Job status (volunteer, career or military), years of service, type of firefighter (e.g. industrial, hazard material, wildland)  |
| <b>Outcomes:</b>                      | Obesity and overweight prevalence based on BMI, body fat percentage or waist circumference.                                     |

## Quality assessment

Quality assessment will be performed independently by two reviewers. Considering various recommendations of not arbitrarily scoring the quality of studies, we will focus our analysis on the source of bias, instead of a general classification of low or high quality based on score [38,40–42]. Juni et al.,[43] compared low-quality and high quality studies in a meta-analysis according to different scoring scales, and found that the scale used could change the result completely.

Since it is not our aim to create a new scale or checklist, we will perform a risk of bias assessment as suggested by Munn et al.,[44] with nine simple questions (Supplementary File 2) that will help us maintain objectivity and reproducibility for updates and new reviews on a similar topic. We will perform a training with the reviewers before the study in order to ensure agreement between them. In case of disagreement the two reviewers will discuss their opinions. If they are not able to reach a consensus the senior authors (LGGP or DLS) will resolve this difference.

## Data analysis

Data will be narratively synthesized. Results will be reported according to the PRISMA statement. Evidence tables will be generated to descriptively summarize the included studies and results according to our objectives. We will compare obesity prevalence between countries and regions, job status (volunteer, career or military), type of firefighter (e.g. industrial, hazard material, wildland) and gender. Confidence intervals for the prevalence will be computed using the data extracted from the articles [45]. We will also evaluate how frequent a certain prevalence values are reported by studies in a worldwide and country analysis e.g. in the US 50% of the studies report an obesity prevalence greater than 33%. Depending on the heterogeneity of risk of bias in the studies, a secondary comparison will be made between those with lower and higher risk.

1  
2  
3 In order to compare firefighter's data with the general population, we will utilize national  
4 and international databases. In the US, we will use NHANES data, in Brazil we will use VIGITEL's  
5 data. Whenever it is not possible to have a non-firefighter representative data set from the  
6 population, data from WHO will be sought. In case a study already provide a similar comparison  
7 to the general population [36,37], this data will be used as representative for their own country. If  
8 possible, we will compare the US data in regard to the region of the country that the data came  
9 from.  
10  
11  
12  
13  
14  
15  
16  
17

18 In order to determine if a prevalence is significantly different, we will adopt a conservative  
19 approach. Specifically, a 95% confidence interval will be calculated and data will be considered  
20 different when confidence intervals do not overlap.  
21  
22  
23  
24  
25

## 26 **ETHICS AND DISSEMINATION**

27  
28 The systematic review does not require ethics clearance since published studies with non-  
29 identifiable data will be used. The results of the systematic review will be disseminated via  
30 publication in a peer-reviewed journal as well as through conference presentations.  
31  
32  
33  
34  
35

## 36 **AUTHOR CONTRIBUTIONS**

37  
38 EMKVKS, LGGP and DLS contributed to the concept of this project, creating the search strategy,  
39 refining the inclusion and exclusion criteria and producing this manuscript. EMKVKS drafted the  
40 protocol. LGGP, DLS and EMKVKS revised the manuscript. LGGP and DLS provided oversight  
41 to the project. All authors read and approved the final version of this manuscript.  
42  
43  
44  
45  
46  
47  
48

## 49 **FUNDING**

50  
51 No institution, funder or sponsor contributed to the development of the protocol. The authors have  
52 not declared a specific grant for this research from any funding agency in the public, commercial  
53  
54  
55  
56  
57  
58  
59  
60

1  
2  
3 or not-for-profit sectors. EMKVKS is a Skidmore College visiting researcher supported by  
4  
5 Coordenação de Aperfeiçoamento de Pessoal de Nível Superior – CAPES – Brazil (scholarship:  
6  
7 88881.188574/2018-01).  
8  
9

## 10 11 **COMPETING INTERESTS**

12  
13 The authors have no competing interests.  
14  
15

## 16 17 **PATIENT CONSENT**

18  
19 Not required.  
20  
21  
22  
23  
24  
25  
26  
27  
28  
29  
30  
31  
32  
33  
34  
35  
36  
37  
38  
39  
40  
41  
42  
43  
44  
45  
46  
47  
48  
49  
50  
51  
52  
53  
54  
55  
56  
57  
58  
59  
60

## REFERENCES

- 1 Fahy RF, LeBlanc PR, Molis JL. Firefighter Fatalities in the United States-2017. Quincy, MA: : National Fire Protection Association 2018. <https://www.nfpa.org/-/media/Files/News-and-Research/Fire-statistics/Fire-service/osFFF.pdf> (accessed 20 Sep 2018).
- 2 Evarts B, Molis JL. United States Firefighter Injuries 2017. Quincy, MA: : NFPA Research 2018.
- 3 Soteriades ES, Smith DL, Tsismenakis AJ, *et al*. Cardiovascular disease in US firefighters: a systematic review. *Cardiol Rev* 2011;**19**:202–15. doi:10.1097/CRD.0b013e318215c105
- 4 Smith DL, Barr DA, Kales SN. Extreme sacrifice: sudden cardiac death in the US Fire Service. *Extreme Physiol Med* 2013;**2**:1.
- 5 Smith DL, DeBlois JP, Kales SN, *et al*. Cardiovascular Strain of Firefighting and the Risk of Sudden Cardiac Events. *Exerc Sport Sci Rev* Published Online First: 22 April 2016. doi:10.1249/JES.0000000000000081
- 6 Kales SN, Smith DL. Firefighting and the Heart: Implications for Prevention. *Circulation* 2017;**135**:1296–9. doi:10.1161/CIRCULATIONAHA.117.027018
- 7 Kales SN, Soteriades ES, Christoudias SG, *et al*. Firefighters and on-duty deaths from coronary heart disease: a case control study. *Environ Health Glob Access Sci Source* 2003;**2**:14. doi:10.1186/1476-069X-2-14
- 8 Korre M, Porto LGG, Farioli A, *et al*. Effect of Body Mass Index on Left Ventricular Mass in Career Male Firefighters. *Am J Cardiol* 2016;**118**:1769–73. doi:10.1016/j.amjcard.2016.08.058
- 9 Storer TW, Dolezal BA, Abrazado ML, *et al*. Firefighter health and fitness assessment: a call to action. *J Strength Cond Res Natl Strength Cond Assoc* 2014;**28**:661–71. doi:10.1519/JSC.0b013e31829b54da
- 10 Ode J, Knous J, Schlaff R, *et al*. Accuracy of body mass index in volunteer firefighters. *Occup Med Oxf Engl* 2014;**64**:193–7. doi:10.1093/occmed/kqt143
- 11 Porto LGG, Nogueira RM, Nogueira EC, *et al*. Agreement between BMI and body fat obesity definitions in a physically active population. *Arch Endocrinol Metab* 2016;**60**:515–25. doi:10.1590/2359-3997000000220
- 12 Strauß M, Foshag P, Przybylek B, *et al*. Occupation and metabolic syndrome: is there correlation? A cross sectional study in different work activity occupations of German firefighters and office workers. *Diabetol Metab Syndr* 2016;**8**:57. doi:10.1186/s13098-016-0174-0
- 13 Jahnke SA, Poston WSC, Haddock CK, *et al*. Obesity and incident injury among career firefighters in the central United States. *Obes Silver Spring Md* 2013;**21**:1505–8. doi:10.1002/oby.20436

- 1  
2  
3 14 Poston WSC, Jitnarin N, Haddock CK, *et al.* Obesity and injury-related absenteeism in a  
4 population-based firefighter cohort. *Obes Silver Spring Md* 2011;**19**:2076–81.  
5 doi:10.1038/oby.2011.147  
6  
7 15 Smith DL, Haller JM, Korre M, *et al.* Pathoanatomic Findings Associated With Duty-Related  
8 Cardiac Death in US Firefighters: A Case-Control Study. *J Am Heart Assoc* 2018;**7**:e009446.  
9 doi:10.1161/JAHA.118.009446  
10  
11 16 Fahs CA, Smith DL, Horn GP, *et al.* Impact of excess body weight on arterial structure,  
12 function, and blood pressure in firefighters. *Am J Cardiol* 2009;**104**:1441–5.  
13 doi:10.1016/j.amjcard.2009.07.009  
14  
15 17 Kappus RM, Fahs CA, Smith D, *et al.* Obesity and overweight associated with increased  
16 carotid diameter and decreased arterial function in young otherwise healthy men. *Am J*  
17 *Hypertens* 2014;**27**:628–34. doi:10.1093/ajh/hpt152  
18  
19 18 Martin-Rodriguez E, Guillen-Grima F, Martí A, *et al.* Comorbidity associated with obesity in a  
20 large population: The APNA study. *Obes Res Clin Pract* 2015;**9**:435–47.  
21 doi:10.1016/j.orcp.2015.04.003  
22  
23 19 Nogueira EC, Porto LGG, Nogueira RM, *et al.* Body Composition is Strongly Associated With  
24 Cardiorespiratory Fitness in a Large Brazilian Military Firefighter Cohort: The Brazilian  
25 Firefighters Study. *J Strength Cond Res* 2016;**30**:33–8. doi:10.1519/JSC.0000000000001039  
26  
27 20 Lai C-C, Sun D, Cen R, *et al.* Impact of long-term burden of excessive adiposity and elevated  
28 blood pressure from childhood on adulthood left ventricular remodeling patterns: the Bogalusa  
29 Heart Study. *J Am Coll Cardiol* 2014;**64**:1580–7. doi:10.1016/j.jacc.2014.05.072  
30  
31 21 De Lorenzo A, Noce A, Moriconi E, *et al.* MOSH Syndrome (Male Obesity Secondary  
32 Hypogonadism): Clinical Assessment and Possible Therapeutic Approaches. *Nutrients*  
33 2018;**10**. doi:10.3390/nu10040474  
34  
35 22 Michalakis K, Mintziori G, Kaprara A, *et al.* The complex interaction between obesity,  
36 metabolic syndrome and reproductive axis: a narrative review. *Metabolism* 2013;**62**:457–78.  
37 doi:10.1016/j.metabol.2012.08.012  
38  
39 23 Aune D, Sen A, Prasad M, *et al.* BMI and all cause mortality: systematic review and non-linear  
40 dose-response meta-analysis of 230 cohort studies with 3.74 million deaths among 30.3  
41 million participants. *BMJ* 2016;**353**:i2156.  
42  
43 24 Cornell DJ, Gnacinski SL, Zamzow A, *et al.* Measures of health, fitness, and functional  
44 movement among firefighter recruits. *Int J Occup Saf Ergon JOSE* 2017;**23**:198–204.  
45 doi:10.1080/10803548.2016.1187001  
46  
47 25 Roberts MA, O’Dea J, Boyce A, *et al.* Fitness levels of firefighter recruits before and after a  
48 supervised exercise training program. *J Strength Cond Res* 2002;**16**:271–7.  
49  
50 26 Tsismenakis AJ, Christophi CA, Burress JW, *et al.* The obesity epidemic and future  
51 emergency responders. *Obes Silver Spring Md* 2009;**17**:1648–50. doi:10.1038/oby.2009.63  
52  
53  
54  
55  
56  
57  
58  
59  
60

- 1  
2  
3 27 Ide CW. Fat future for firefighters? Changes in prevalence of obesity in Scottish local authority  
4 firefighters. *Scott Med J* 2012;**57**:247. doi:10.1258/smj.2012.012114  
5
- 6 28 Bonnell E, Huggins C, Huggins C, *et al.* Influences on Dietary Choices during Day versus  
7 Night Shift in Shift Workers: A Mixed Methods Study. *Nutrients* 2017;**9**:193.  
8 doi:10.3390/nu9030193  
9
- 10 29 Kim M-J, Son K-H, Park H-Y, *et al.* Association between shift work and obesity among female  
11 nurses: Korean Nurses' Survey. *BMC Public Health* 2013;**13**:1204. doi:10.1186/1471-2458-  
12 13-1204  
13
- 14 30 Antunes LC, Levandovski R, Dantas G, *et al.* Obesity and shift work: chronobiological  
15 aspects. *Nutr Res Rev* 2010;**23**:155–68. doi:10.1017/S0954422410000016  
16
- 17 31 Sun M, Feng W, Wang F, *et al.* Meta-analysis on shift work and risks of specific obesity types.  
18 *Obes Rev Off J Int Assoc Study Obes* 2018;**19**:28–40. doi:10.1111/obr.12621  
19
- 20 32 Soteriades ES, Hauser R, Kawachi I, *et al.* Obesity and cardiovascular disease risk factors in  
21 firefighters: a prospective cohort study. *Obes Res* 2005;**13**:1756–63.  
22 doi:10.1038/oby.2005.214  
23
- 24 33 Elliot DL, Goldberg L, Kuehl KS, *et al.* The PHLAME (Promoting Healthy Lifestyles: Alternative  
25 Models' Effects) firefighter study: outcomes of two models of behavior change. *J Occup  
26 Environ Med* 2007;**49**:204–13. doi:10.1097/JOM.0b013e3180329a8d  
27
- 28 34 Mozaffarian D, Hao T, Rimm EB, *et al.* Changes in diet and lifestyle and long-term weight  
29 gain in women and men. *N Engl J Med* 2011;**364**:2392–404. doi:10.1056/NEJMoa1014296  
30
- 31 35 Poston WSC, Haddock CK, Jahnke SA, *et al.* The prevalence of overweight, obesity, and  
32 substandard fitness in a population-based firefighter cohort. *J Occup Environ Med*  
33 2011;**53**:266–73. doi:10.1097/JOM.0b013e31820af362  
34
- 35 36 Gurevich KG, Poston WSC, Anders B, *et al.* Obesity prevalence and accuracy of BMI-defined  
36 obesity in Russian firefighters. *Occup Med Oxf Engl* 2017;**67**:61–3.  
37 doi:10.1093/occmed/kqw136  
38
- 39 37 Leischik R, Foshag P, Strauß M, *et al.* Aerobic Capacity, Physical Activity and Metabolic Risk  
40 Factors in Firefighters Compared with Police Officers and Sedentary Clerks. *PLoS One*  
41 2015;**10**:e0133113. doi:10.1371/journal.pone.0133113  
42
- 43 38 Liberati A, Altman DG, Tetzlaff J, *et al.* The PRISMA statement for reporting systematic  
44 reviews and meta-analyses of studies that evaluate healthcare interventions: explanation and  
45 elaboration. *BMJ* 2009;**339**:b2700.  
46
- 47 39 Shamseer L, Moher D, Clarke M, *et al.* Preferred reporting items for systematic review and  
48 meta-analysis protocols (PRISMA-P) 2015: elaboration and explanation. *BMJ*  
49 2015;**349**:g7647. doi:10.1136/bmj.g7647  
50
- 51 40 Boyle MH. Guidelines for evaluating prevalence studies. *Evid Based Ment Health* 1998;**1**:37–  
52 9. doi:10.1136/ebmh.1.2.37  
53  
54  
55  
56  
57  
58  
59

- 1  
2  
3 41 Higgins JPT, Altman DG, Gøtzsche PC, *et al.* The Cochrane Collaboration's tool for assessing  
4 risk of bias in randomised trials. *BMJ* 2011;**343**:d5928.  
5  
6 42 Stang A. Critical evaluation of the Newcastle-Ottawa scale for the assessment of the quality  
7 of nonrandomized studies in meta-analyses. *Eur J Epidemiol* 2010;**25**:603–5.  
8 doi:10.1007/s10654-010-9491-z  
9  
10 43 Jüni P, Witschi A, Bloch R, *et al.* The hazards of scoring the quality of clinical trials for meta-  
11 analysis. *JAMA* 1999;**282**:1054–60.  
12  
13 44 Munn Z, Moola S, Lisy K, *et al.* Methodological guidance for systematic reviews of  
14 observational epidemiological studies reporting prevalence and cumulative incidence data.  
15 *Int J Evid Based Healthc* 2015;**13**:147–53. doi:10.1097/XEB.0000000000000054  
16  
17 45 Newcombe RG. Two-sided confidence intervals for the single proportion: comparison of  
18 seven methods. *Stat Med* 1998;**17**:857–72.  
19  
20  
21  
22  
23  
24  
25  
26  
27  
28  
29  
30  
31  
32  
33  
34  
35  
36  
37  
38  
39  
40  
41  
42  
43  
44  
45  
46  
47  
48  
49  
50  
51  
52  
53  
54  
55  
56  
57  
58  
59  
60

## SUPPLEMENTARY FILE 1

| <b>Eligibility Form – Please cross “yes” or “no” considering the content of the paper</b>                                              |            |           |
|----------------------------------------------------------------------------------------------------------------------------------------|------------|-----------|
|                                                                                                                                        | <b>YES</b> | <b>NO</b> |
| Does the study possess the main outcome of interest? (Obesity prevalence using BMI, %BF or WC)                                         |            |           |
| Does the study possess at least one group that may be analyzed or provide outcome of interest in which there are only firefighters in? |            |           |
| Are men and women in separate groups in the reported data?                                                                             |            |           |

*If all answers are yes, then the study is eligible.*

## SUPPLEMENTARY FILE 2

## Risk of bias assesment scale

|                                                                                                 | Yes                      | No                       | Unclear                  | Not applicable           |
|-------------------------------------------------------------------------------------------------|--------------------------|--------------------------|--------------------------|--------------------------|
| A. Was the sample frame appropriate to address the target population?                           | <input type="checkbox"/> | <input type="checkbox"/> | <input type="checkbox"/> | <input type="checkbox"/> |
| B. Were study participants sampled in an appropriate way?                                       | <input type="checkbox"/> | <input type="checkbox"/> | <input type="checkbox"/> | <input type="checkbox"/> |
| C. Was the sample size adequate?                                                                | <input type="checkbox"/> | <input type="checkbox"/> | <input type="checkbox"/> | <input type="checkbox"/> |
| D. Were the study subjects and the setting described in detail?                                 | <input type="checkbox"/> | <input type="checkbox"/> | <input type="checkbox"/> | <input type="checkbox"/> |
| E. Was the data analysis conducted with sufficient coverage of the identified sample?           | <input type="checkbox"/> | <input type="checkbox"/> | <input type="checkbox"/> | <input type="checkbox"/> |
| F. Were valid methods used for the identification of the condition?                             | <input type="checkbox"/> | <input type="checkbox"/> | <input type="checkbox"/> | <input type="checkbox"/> |
| G. Was the condition measure in a standard, reliable way for all participants?                  | <input type="checkbox"/> | <input type="checkbox"/> | <input type="checkbox"/> | <input type="checkbox"/> |
| H. Was there appropriate statistical analysis?                                                  | <input type="checkbox"/> | <input type="checkbox"/> | <input type="checkbox"/> | <input type="checkbox"/> |
| I. Was the response rate adequate, and if not, was the low response rate managed appropriately? | <input type="checkbox"/> | <input type="checkbox"/> | <input type="checkbox"/> | <input type="checkbox"/> |

# REPORTING CHECKLIST FOR PROTOCOL OF A SYSTEMATIC REVIEW.

PRISMA-P (Preferred Reporting Items for Systematic review and Meta-Analysis Protocols) 2015  
checklist: recommended items to address in a systematic review protocol

|                |     | Reporting Item                                                                                                                                                                                  | Page Number |
|----------------|-----|-------------------------------------------------------------------------------------------------------------------------------------------------------------------------------------------------|-------------|
| Identification | #1a | Identify the report as a protocol of a systematic review                                                                                                                                        | 1           |
| Update         | #1b | If the protocol is for an update of a previous systematic review, identify as such                                                                                                              | N/A         |
|                | #2  | If registered, provide the name of the registry (such as PROSPERO) and registration number                                                                                                      | 6           |
| Contact        | #3a | Provide name, institutional affiliation, e-mail address of all protocol authors; provide physical mailing address of corresponding author                                                       | 1           |
| Contribution   | #3b | Describe contributions of protocol authors and identify the guarantor of the review                                                                                                             | 10          |
|                | #4  | If the protocol represents an amendment of a previously completed or published protocol, identify as such and list changes; otherwise, state plan for documenting important protocol amendments | N/A         |
| Sources        | #5a | Indicate sources of financial or other support for the review                                                                                                                                   | 10-11       |

|    |                      |      |                                                                   |       |
|----|----------------------|------|-------------------------------------------------------------------|-------|
| 1  | Sponsor              | #5b  | Provide name for the review funder and / or sponsor               | 10-11 |
| 2  |                      |      |                                                                   |       |
| 3  |                      |      |                                                                   |       |
| 4  | Role of sponsor or   | #5c  | Describe roles of funder(s), sponsor(s), and / or institution(s), | N/A   |
| 5  | funder               |      | if any, in developing the protocol                                |       |
| 6  |                      |      |                                                                   |       |
| 7  |                      |      |                                                                   |       |
| 8  |                      |      |                                                                   |       |
| 9  |                      |      |                                                                   |       |
| 10 | Rationale            | #6   | Describe the rationale for the review in the context of what is   | 4-5   |
| 11 |                      |      | already known                                                     |       |
| 12 |                      |      |                                                                   |       |
| 13 |                      |      |                                                                   |       |
| 14 |                      |      |                                                                   |       |
| 15 | Objectives           | #7   | Provide an explicit statement of the question(s) the review will  | 5-6   |
| 16 |                      |      | address with reference to participants, interventions,            |       |
| 17 |                      |      | comparators, and outcomes (PICO)                                  |       |
| 18 |                      |      |                                                                   |       |
| 19 |                      |      |                                                                   |       |
| 20 |                      |      |                                                                   |       |
| 21 |                      |      |                                                                   |       |
| 22 |                      |      |                                                                   |       |
| 23 | Eligibility criteria | #8   | Specify the study characteristics (such as PICO, study design,    | 7     |
| 24 |                      |      | setting, time frame) and report characteristics (such as years    |       |
| 25 |                      |      | considered, language, publication status) to be used as           |       |
| 26 |                      |      | criteria for eligibility for the review                           |       |
| 27 |                      |      |                                                                   |       |
| 28 |                      |      |                                                                   |       |
| 29 |                      |      |                                                                   |       |
| 30 |                      |      |                                                                   |       |
| 31 |                      |      |                                                                   |       |
| 32 |                      |      |                                                                   |       |
| 33 | Information          | #9   | Describe all intended information sources (such as electronic     | 6-8   |
| 34 | sources              |      | databases, contact with study authors, trial registers or other   |       |
| 35 |                      |      | grey literature sources) with planned dates of coverage           |       |
| 36 |                      |      |                                                                   |       |
| 37 |                      |      |                                                                   |       |
| 38 |                      |      |                                                                   |       |
| 39 |                      |      |                                                                   |       |
| 40 | Search strategy      | #10  | Present draft of search strategy to be used for at least one      | 6-7   |
| 41 |                      |      | electronic database, including planned limits, such that it       |       |
| 42 |                      |      | could be repeated                                                 |       |
| 43 |                      |      |                                                                   |       |
| 44 |                      |      |                                                                   |       |
| 45 |                      |      |                                                                   |       |
| 46 |                      |      |                                                                   |       |
| 47 |                      |      |                                                                   |       |
| 48 | Study records -      | #11a | Describe the mechanism(s) that will be used to manage             | 7-8   |
| 49 | data management      |      | records and data throughout the review                            |       |
| 50 |                      |      |                                                                   |       |
| 51 |                      |      |                                                                   |       |
| 52 |                      |      |                                                                   |       |
| 53 | Study records -      | #11b | State the process that will be used for selecting studies (such   | 7-8   |
| 54 | selection process    |      | as two independent reviewers) through each phase of the           |       |
| 55 |                      |      | review (that is, screening, eligibility and inclusion in meta-    |       |
| 56 |                      |      |                                                                   |       |
| 57 |                      |      |                                                                   |       |
| 58 |                      |      |                                                                   |       |
| 59 |                      |      |                                                                   |       |
| 60 |                      |      |                                                                   |       |

|    |                    |           |                                                                                 |     |
|----|--------------------|-----------|---------------------------------------------------------------------------------|-----|
| 1  |                    | analysis) |                                                                                 |     |
| 2  |                    |           |                                                                                 |     |
| 3  |                    |           |                                                                                 |     |
| 4  | Study records -    | #11c      | Describe planned method of extracting data from reports                         | 7-8 |
| 5  |                    |           |                                                                                 |     |
| 6  | data collection    |           | (such as piloting forms, done independently, in duplicate), any                 |     |
| 7  |                    |           |                                                                                 |     |
| 8  | process            |           | processes for obtaining and confirming data from investigators                  |     |
| 9  |                    |           |                                                                                 |     |
| 10 |                    |           |                                                                                 |     |
| 11 | Data items         | #12       | List and define all variables for which data will be sought                     | 8   |
| 12 |                    |           |                                                                                 |     |
| 13 |                    |           | (such as PICO items, funding sources), any pre-planned data                     |     |
| 14 |                    |           |                                                                                 |     |
| 15 |                    |           |                                                                                 |     |
| 16 |                    |           | assumptions and simplifications                                                 |     |
| 17 |                    |           |                                                                                 |     |
| 18 |                    |           |                                                                                 |     |
| 19 | Outcomes and       | #13       | List and define all outcomes for which data will be sought,                     | 8   |
| 20 |                    |           |                                                                                 |     |
| 21 | prioritization     |           | including prioritization of main and additional outcomes, with                  |     |
| 22 |                    |           |                                                                                 |     |
| 23 |                    |           | rationale                                                                       |     |
| 24 |                    |           |                                                                                 |     |
| 25 |                    |           |                                                                                 |     |
| 26 | Risk of bias in    | #14       | Describe anticipated methods for assessing risk of bias of                      | 9   |
| 27 |                    |           |                                                                                 |     |
| 28 | individual studies |           | individual studies, including whether this will be done at the                  |     |
| 29 |                    |           |                                                                                 |     |
| 30 |                    |           | outcome or study level, or both; state how this information will                |     |
| 31 |                    |           |                                                                                 |     |
| 32 |                    |           | be used in data synthesis                                                       |     |
| 33 |                    |           |                                                                                 |     |
| 34 |                    |           |                                                                                 |     |
| 35 |                    |           |                                                                                 |     |
| 36 | Data synthesis     | #15a      | Describe criteria under which study data will be quantitatively                 | 9   |
| 37 |                    |           |                                                                                 |     |
| 38 |                    |           | synthesised                                                                     |     |
| 39 |                    |           |                                                                                 |     |
| 40 |                    |           |                                                                                 |     |
| 41 |                    |           |                                                                                 |     |
| 42 |                    | #15b      | If data are appropriate for quantitative synthesis, describe                    | N/A |
| 43 |                    |           |                                                                                 |     |
| 44 |                    |           | planned summary measures, methods of handling data and                          |     |
| 45 |                    |           |                                                                                 |     |
| 46 |                    |           | methods of combining data from studies, including any                           |     |
| 47 |                    |           |                                                                                 |     |
| 48 |                    |           | planned exploration of consistency (such as I <sup>2</sup> , Kendall's $\tau$ ) |     |
| 49 |                    |           |                                                                                 |     |
| 50 |                    |           |                                                                                 |     |
| 51 |                    |           |                                                                                 |     |
| 52 |                    | #15c      | Describe any proposed additional analyses (such as                              | N/A |
| 53 |                    |           |                                                                                 |     |
| 54 |                    |           | sensitivity or subgroup analyses, meta-regression)                              |     |
| 55 |                    |           |                                                                                 |     |
| 56 |                    |           |                                                                                 |     |
| 57 |                    | #15d      | If quantitative synthesis is not appropriate, describe the type                 | 9   |
| 58 |                    |           |                                                                                 |     |
| 59 |                    |           |                                                                                 |     |
| 60 |                    |           |                                                                                 |     |

of summary planned

1  
2  
3  
4 Meta-bias(es) #16 Specify any planned assessment of meta-bias(es) (such as N/A  
5  
6 publication bias across studies, selective reporting within  
7  
8 studies)  
9

10  
11 Confidence in #17 Describe how the strength of the body of evidence will be N/A  
12  
13 cumulative assessed (such as GRADE)  
14  
15 evidence  
16  
17

18  
19 The PRISMA-P checklist is distributed under the terms of the Creative Commons Attribution License  
20  
21 CC-BY 4.0. This checklist was completed on 20. March 2019 using <https://www.goodreports.org/>, a  
22  
23 tool made by the [EQUATOR Network](#) in collaboration with [Penelope.ai](#)  
24  
25  
26  
27  
28  
29  
30  
31  
32  
33  
34  
35  
36  
37  
38  
39  
40  
41  
42  
43  
44  
45  
46  
47  
48  
49  
50  
51  
52  
53  
54  
55  
56  
57  
58  
59  
60

# BMJ Open

## Worldwide prevalence of obesity among firefighters: a systematic review protocol

|                                 |                                                                                                                                                                                                                                                                                                                                                                                                                                                                                                                  |
|---------------------------------|------------------------------------------------------------------------------------------------------------------------------------------------------------------------------------------------------------------------------------------------------------------------------------------------------------------------------------------------------------------------------------------------------------------------------------------------------------------------------------------------------------------|
| Journal:                        | <i>BMJ Open</i>                                                                                                                                                                                                                                                                                                                                                                                                                                                                                                  |
| Manuscript ID                   | bmjopen-2019-031282.R1                                                                                                                                                                                                                                                                                                                                                                                                                                                                                           |
| Article Type:                   | Protocol                                                                                                                                                                                                                                                                                                                                                                                                                                                                                                         |
| Date Submitted by the Author:   | 18-Oct-2019                                                                                                                                                                                                                                                                                                                                                                                                                                                                                                      |
| Complete List of Authors:       | Melo Keene von Koenig Soares, Edgard; Universidade de Brasilia, Faculdade de Educação Física; Skidmore College, Health and Human Physiological Sciences/ First Responder Health and Safety Laboratory<br>Smith, Denise; Skidmore College, Health and Human Physiological Sciences/ First Responder Health and Safety Laboratory<br>Grossi Porto, Luiz Guilherme; Universidade de Brasilia, Faculdade de Educação Física; Harvard University T H Chan School of Public Health, Department of Environmental Health |
| <b>Primary Subject Heading</b>: | Public health                                                                                                                                                                                                                                                                                                                                                                                                                                                                                                    |
| Secondary Subject Heading:      | Occupational and environmental medicine, Epidemiology, Public health                                                                                                                                                                                                                                                                                                                                                                                                                                             |
| Keywords:                       | Fire and Rescue Personnel, Abdominal Fat, Overweight, PUBLIC HEALTH                                                                                                                                                                                                                                                                                                                                                                                                                                              |
|                                 |                                                                                                                                                                                                                                                                                                                                                                                                                                                                                                                  |

SCHOLARONE™  
Manuscripts

1  
2  
3 **TITLE:** Worldwide prevalence of obesity among firefighters: a systematic review protocol  
4  
5  
6

7 **AUTHORS:** Edgard MKVK Soares<sup>1,2</sup>, Denise L Smith<sup>1</sup>, Luiz GG Porto<sup>2</sup>.  
8

9 1 – Health and Human Physiological Sciences, Skidmore College, Saratoga Springs-NY, USA  
10

11 2 – Faculdade de Educação Física, Universidade de Brasília, Brasília-DF, Brazil  
12

13 Corresponding author: Luiz GG Porto  
14  
15

16  
17  
18 **Corresponding author:** Prof. Luiz Guilherme Grossi Porto  
19

- 20 • **Address:** Campus Universitário Darcy Ribeiro
- 21
- 22 • **Brasília** – DF, Brazil – zip code: 70910-900
- 23
- 24 • **Phone:** +55 (61) 3107-2525; fax: +55 (61) 3107-2525
- 25
- 26 • **E-mail:** lgporto@hsph.harvard.edu/ luizggporto@gmail.com  
27

28  
29 **Word count:** 2,350  
30

31 **Number of Figures:**0  
32

33 **Number of Tables:** 1  
34

35 **Number of References:** 50  
36

37 **Number of Supplementary Files:** 2  
38  
39  
40  
41  
42  
43  
44  
45  
46  
47  
48  
49  
50  
51  
52  
53  
54  
55  
56  
57  
58  
59  
60

## ABSTRACT

### Introduction

Obesity may interfere with job performance and increase the risk of injury during firefighting activity. Obesity also has many deleterious effects on health indices and is associated with higher all-cause mortality. Studies report a high prevalence of obesity in the Fire Service. Also, firefighters' work schedule (12-24h shifts) and food availability during night shifts may be related to weight gain. Studies in American firefighters have shown annual weight gain between 0.5-1.5 kg. This study aims to report the obesity prevalence in the Fire Service to describe how it varies based on country and region, job status, type of firefighter and gender.

### Methods and analysis

The main outcome evaluated will be obesity prevalence. We will systematically search the literature databases PubMed, Medline, Web of Science, Sportdiscus, Academic Search Premier, CINAHL, SciTech Premium Collection, Sports Medicine & Education Index, Research Library, and Scopus. One reviewer will perform the search. Two independent reviewers will select studies, extract data from eligible studies, and evaluate their methodological and reporting quality. Agreement between reviewers will be measured using Cohen's Kappa. Other data of interest will include age, body mass index, body fat percentage, job status (career, volunteer or military), years of service and type of firefighter (e.g., structural, wildland firefighter). We will produce a narrative summary of our findings. Tables will be generated to summarise data.

### Ethics and dissemination

This systematic review does not require ethics clearance since published studies with non-identifiable data will be used. The results of the systematic review will be disseminated via publication in a peer-reviewed journal and through conference presentations

### Registration and review status

1  
2  
3  
4  
5  
6  
7  
8  
9  
10  
11  
12  
13  
14  
15  
16  
17  
18  
19  
20  
21  
22  
23  
24  
25  
26  
27  
28  
29  
30  
31  
32  
33  
34  
35  
36  
37  
38  
39  
40  
41  
42  
43  
44  
45  
46  
47  
48  
49  
50  
51  
52  
53  
54  
55  
56  
57  
58  
59  
60

This systematic review protocol has been registered at PROSPERO (CRD42019129122).  
The systematic review process will start once the protocol has gone through full external peer review at the BMJ Open (estimated date: 12 January 2020).

For peer review only

## Keywords

Fire and Rescue Personnel, Abdominal Fat, Overweight, Public Health

## ARTICLE SUMMARY

### Strengths and limitations of this study

- The first systematic review of worldwide obesity prevalence among firefighters.
- A comprehensive synthesis of worldwide obesity prevalence, including a narrative comparison with the country of origin of the study using a standardised risk of bias tool.
- Study selection and risk of bias assessment will be performed independently by two researchers, which will ensure that all relevant studies are included without personal biases.
- A potential limitation of this review may be a small number of studies available for countries other than the United States.

## INTRODUCTION

1  
2  
3  
4  
5  
6  
7  
8  
9  
10  
11  
12  
13  
14  
15  
16  
17  
18  
19  
20  
21  
22  
23  
24  
25  
26  
27  
28  
29  
30  
31  
32  
33  
34  
35  
36  
37  
38  
39  
40  
41  
42  
43  
44  
45  
46  
47  
48  
49  
50  
51  
52  
53  
54  
55  
56  
57  
58  
59  
60

Firefighters perform critical public safety work. Considering all the different occupational hazards firefighters face, it is surprising to many that the leading cause of duty-related death among United States (US) firefighters is sudden cardiac death (SCD). In 2017, SCD accounted for almost half of on-duty deaths in the US, and SCD has been responsible for about 43% of on-duty fatalities for the last ten years [1]. Furthermore, for every fatal on-duty cardiac event, there are an estimated 20 nonfatal on-duty cardiovascular events [2]. Theoretical models have been proposed in order to conceptualise how firefighting interacts with individual risk factors like obesity to increase the risk of SCD [3–6].

Clearly, the underlying health of firefighters is one of the important aspects associated with cardiovascular death in the Fire Service. Also, individual risk factors are critical factors in determining the risk of SCD. Research has consistently found a high prevalence of cardiovascular disease risk factors among firefighters. Obesity increases the odds of a fatal on-duty coronary heart disease event by 1.5-6.6 times [7] and is highly associated with cardiomegaly in firefighters [8]. Studies report obesity prevalence in the US ranging from 22% [9] to 60% [10] depending on the region, age and type of firefighter (career or volunteer). Outside of the US, lower estimates of obesity have been reported. In Brazil, obesity rates of less than 15% have been reported for military based firefighters [11,12].

Obesity may interfere with job performance and increase the risk of injury during firefighting activity [13–15]. Obesity also has many deleterious effects on health indices, including: reduced arterial function [16,17], glucose intolerance, dyslipidemia, type 2 diabetes, hypertension, osteoarthritis [18], low cardiorespiratory fitness [19], pathological remodeling of the heart [20], endocrine disorders [21,22], and is associated with higher all-cause mortality [23].

Several studies have reported that US firefighter recruits begin their career with an elevated BMI [24–26]. Few studies report the actual obesity prevalence within firefighter recruits. One study performed in Tucson, Arizona reported an obesity prevalence of 15.6% in firefighter

1  
2  
3 recruits [27]. A separate study from Massachusetts that included both firefighter and ambulance  
4 personnel recruits found a prevalence of 33% [28]. Research has also shown that a significant  
5 weight gain occurs during a firefighter's career [28,29]. A recent case-control study which  
6 retrospectively examined all available autopsy records of US firefighters between 1999 and 2014  
7 has shown obesity prevalence estimates as high as 59.2% among firefighters who died due to  
8 cardiac issues (cardiac cases) and 47.7% among noncardiac trauma controls [15].  
9

10  
11  
12  
13  
14  
15  
16  
17  
18  
19  
20  
21  
22  
23  
24  
25  
26  
27  
28  
29  
30  
31  
32  
33  
34  
35  
36  
37  
38  
39  
40  
41  
42  
43  
44  
45  
46  
47  
48  
49  
50  
51  
52  
53  
54  
55  
56  
57  
58  
59  
60  
Firefighters' work schedule (12-24 hour work shifts) and lower availability of healthy food  
during night shifts may be an important contribution to weight gain [30] as shift-working by itself  
is considered an independent risk factor for obesity [31–33]. Some US cohort studies report  
firefighters' annual weight gain ranging from 0.5 kg [34] to 1.5 kg [35]. Ide [29] reports similar  
values for Scottish firefighters, with a mean gain of 1.5 kg/year. This could represent a gain of 5  
kg to 15 kg of weight in 10 years of service. Data from the Health Professionals Follow-Up Study  
show a significant weight gain of 0.2 kg every year [36], a considerably lower value compared to  
those in firefighters. These facts raise an interesting question, specifically, do firefighters have a  
high obesity prevalence because of the population of origin, i.e. those who become firefighters  
(US population) have a large proportion of men with obesity, or does firefighting lead to obesity,  
or is it associated with the burden of their type of service.

Poston et al., [37] analysed the obesity prevalence in 677 firefighters and compared them  
to the national obesity prevalence (US adults). While prevalence was similar, in a separate  
analysis, volunteers seemed to possess a higher prevalence of obesity compared to US adults  
and career firefighters. Other studies show similarities between the firefighters and their original  
population [19,38]. In contrast, German firefighters seem to be more fit than sedentary clerks and  
police officers from the same region [39].

There is an important need to understand the obesity prevalence in the Fire Service due  
to its relation to health and job performance. Understanding if this is a phenomenon isolated to  
US firefighters or occurring globally. It is also important to understand potential factors that could

1  
2  
3 be associated with such phenomenon, from ageing to job status. An increased understanding of  
4 obesity would be important for fire service leaders and policymakers in order to create effective  
5 strategies to decrease obesity and lead to better health and job performance in the Fire Service.  
6  
7 Thus, this study aims to (1) report the obesity prevalence in the Fire Service (2) to describe how  
8 it varies based on country and region, job status, type of firefighter and gender.  
9  
10  
11  
12  
13  
14  
15

## 16 **Objectives**

17 The present study intends to address the following questions:

- 18 • What is the prevalence of obesity among firefighters around the world?
- 19
- 20 • Is the obesity prevalence among firefighters different from their own original
- 21 population?
- 22
- 23 • Does the job status affect firefighters' obesity prevalence (volunteer, career, military)?
- 24
- 25 • Does the type of firefighter affect obesity prevalence (structural, wildland, industrial)?
- 26
- 27 • Does age have an important influence on obesity prevalence?
- 28
- 29 • Has firefighters' obesity prevalence changed over the years, i.e. do older studies report
- 30 an obesity prevalence different from more recent ones?
- 31
- 32
- 33
- 34
- 35
- 36
- 37
- 38

## 39 **METHODS AND ANALYSIS**

40 The systematic review process will start once the protocol has been through full external peer  
41 review at the BMJ Open (estimated date: 12 January 2020).  
42  
43  
44  
45  
46  
47

### 48 **Protocol and registration**

49 The methods for this systematic review have been developed according to  
50 recommendations from the Preferred Reporting Items for Systematic Reviews and Meta-Analyses  
51 (PRISMA)[40] and Preferred Reporting Items for Systematic Review and Meta-Analysis Protocols  
52  
53  
54  
55  
56  
57  
58  
59  
60

(PRISMA-P)[41] statements. This protocol has been registered in the International Prospective Register of Systematic Reviews (PROSPERO) under the registration number CRD42019129122.

## Search strategy

The following electronic databases will be searched:

- PubMed
- Medline
- Web of Science
- Academic Search Premier (EBSCO)
- Sportdiscus (EBSCO)
- CINAHL (EBSCO)
- SciTech Premium Collection (ProQuest)
- Sports Medicine & Education Index (ProQuest)
- Research Library (ProQuest)
- Scopus

We will search for studies reporting data on firefighters' BMI, body fat percentage (BF%) and obesity prevalence using the following search term:

- ((Firefighter OR Firefighting OR Firefighters OR Firefighter's OR Firefighters') AND (obesity OR overweight OR "excess weight" OR adiposity OR waist OR "body mass index" OR bmi OR "body fat"))

There will be no time limit, i.e. studies may have been published in any year. Searches will be limited to peer-reviewed journals. Grey literature will not be included.

## Eligibility criteria

1  
2  
3 In order to be included in this study, studies must report data from firefighters as a unique  
4 group. Data from other professionals (e.g. police officers) should constitute a different, separate  
5 group. Studies may have a cross-sectional or longitudinal design. If a study has multiple time  
6 points in the same cohort, we will use the most recent time point for the prevalence report but will  
7 use other time points to address our last objective. Although we are not interested in interventions,  
8 intervention studies will also be included, and pre-intervention data will be used instead of post.  
9 Data from males and females will be analysed separately due to a sex-related difference in obesity  
10 prevalence[42,43]. Although the search will be performed in English, we will include studies  
11 written in any language; which will be translated when necessary to ensure eligibility, and for data  
12 extraction when eligibility is confirmed. In cases where it is impossible to translate the studies, it  
13 will be noted, and we will report the number of studies in this situation.  
14  
15

16 Prevalence data must be calculated from body mass index (BMI), per cent body fat (%BF)  
17 or waist circumference. The method employed to measure body fat percentage will also be  
18 recorded to account for possible differences among methods. Although other variables may be  
19 used to define obesity, e.g., waist-to-height ratio; these indices are probably not often used in  
20 firefighter studies; also, their agreement with traditional indices are unknown and may  
21 overestimate obesity in the Fire Service[44]. Thus, the authors decided to include only obesity  
22 prevalence data that used BMI, %BF and waist circumference. To increase objectivity, reviewers  
23 will use a simple form to assess eligibility (Supplementary File 1).  
24  
25  
26  
27  
28  
29  
30  
31  
32  
33  
34  
35  
36  
37  
38  
39  
40  
41  
42  
43  
44

#### 45 **Data extraction**

46  
47 One reviewer will perform the literature search; results will be saved in a reference  
48 manager; duplicates will be eliminated using the provided software tools. Remaining files will be  
49 shared with the second reviewer. The two reviewers will independently screen titles and abstracts  
50 for eligibility. Full texts will then be obtained for those that meet inclusion criteria or are uncertain.  
51 The full text will then be screened, and reviewers will independently decide whether the paper  
52  
53  
54  
55  
56  
57  
58  
59  
60

1  
2  
3 meets all requirements for inclusion in the study. Reviewers will record the reasons for excluding  
4 studies. At the end of the independent assessment, results from the two reviewers will be shared,  
5 and the agreement between the two reviewers will be assessed using kappa statistics. If  
6 discrepancies occur, they will be discussed between the two reviewers. If they cannot reach  
7 consensus, one of the senior authors (LGGP or DLS) will resolve the issue. Investigators will not  
8 be blind to the journal titles or institutions or study authors.  
9  
10  
11  
12  
13  
14

15  
16 In order to avoid double-counting, when there are multiple studies from the same cohort,  
17 the study with the largest sample size will be used. If the sample size does not vary, the most  
18 recent paper will be used. We will also look for similarities (sample size, firefighter headquarter  
19 and mean age) between studies of the same author or group to ensure they are not the same  
20 sample.  
21  
22  
23  
24  
25

26 Both reviewers will independently use a standardised excel spreadsheet to extract and  
27 store data of interest (Table 1) from the studies chosen to be included in the review. An agreement  
28 analysis will be performed between reviewers for each data of interest using kappa statistics to  
29 evaluate if both reviewers have the same data present in the spreadsheet. Both spreadsheets will  
30 be united in one excel file, and data of interest will be compared between spreadsheets using an  
31 IF function, e.g. =IF(A1=B1;"0";"1"). Reviewers will discuss differences until spreadsheets contain  
32 the same information. In the remote possibility of any difficulties in this process, one of the senior  
33 authors (LGGP or DLS) will be contacted in order to solve the issue  
34  
35  
36  
37  
38  
39  
40  
41  
42

43 Authors of included or screened articles may be contacted to obtain additional information,  
44 i.e., in case important information is missing from the manuscript, but authors are likely to have it.  
45 One reviewer will send an e-mail to the corresponding author's e-mail address, based on  
46 information in the article; a maximum of two attempts will be made, each separated by one week.  
47  
48  
49  
50

51 Data of interest are presented in Table 1.

52 Table 1. Data of interest that will be sought from eligible studies  
53  
54  
55  
56  
57  
58  
59  
60

|                                        |                                                                                                                                 |
|----------------------------------------|---------------------------------------------------------------------------------------------------------------------------------|
| <b>Author details:</b>                 | Name of first author, journal where the article was published, language and publication year.                                   |
| <b>Study characteristics:</b>          | Study design, sampling method, data collection period, and time of data collection (e.g. a 2016 study may have data from 2009). |
| <b>Participants' characteristics:</b>  | Age, BMI, %BF and waist circumference.                                                                                          |
| <b>Firefighters' characteristics:</b>  | Job status (volunteer, career or military), years of service, type of firefighter (e.g. industrial, hazard material, wildland)  |
| <b>Outcomes:</b>                       | Obesity and overweight prevalence                                                                                               |
| <b>Methods used to define obesity:</b> | BMI, %BF or waist circumference.                                                                                                |

### Quality assessment

Quality assessments will be performed independently by both reviewers. We will focus our analysis on the risk of bias since manuscript “quality” may be an ambiguous term and different interpretations of it can significantly impact reviews and meta-analysis results [40,45–48].

We will perform a risk of bias assessment using the Joanna Briggs Institute’s critical appraisal checklist for studies reporting prevalence data as suggested by Munn et al.,[49] which contains nine simple questions (Supplementary File 2) that evaluate risk of bias in topics such as: sampling frame, sample size, data analysis, validity of the methods and response rate i.e. the proportion of individuals who agreed to participate from all who were invited.

In order to improve agreement, objectivity and reproducibility of the reviewers, we will perform training with the reviewers before the study is initiated. In case of disagreement, the two

1  
2  
3 reviewers will discuss their opinions. If they are not able to reach a consensus, the senior authors  
4  
5 (LGGP or DLS) will resolve this difference.  
6  
7  
8

## 9 **Data analysis**

10  
11 Data will be narratively synthesised. Results will be reported according to the PRISMA  
12 statement[40]. Evidence tables will be generated to descriptively summarise the included studies  
13 and results according to our objectives. We will compare obesity prevalence based on countries  
14 and regions, job status (volunteer, career or military), type of firefighter (e.g. industrial, structural  
15 material, wildland) and gender. Confidence intervals for the prevalence will be computed using  
16 the data extracted from the articles [50]. We will also evaluate how frequently a specific  
17 prevalence value is reported by studies in a worldwide and country analysis, e.g. in the US, 50%  
18 of the studies report an obesity prevalence greater than 33%. Depending on the heterogeneity of  
19 risk of bias in the studies, a secondary comparison will be made between those with lower and  
20 higher risk.  
21  
22  
23  
24  
25  
26  
27  
28  
29  
30  
31

32  
33 In order to compare firefighter data with the general population, we will utilise the World  
34 Health Organization's (WHO) age-standardised obesity prevalence that is available for almost all  
35 countries. In case a study already provides an age-standardised obesity prevalence of its country  
36 of origin[38,39], this data will have priority over the WHO data. When possible, we will compare  
37 firefighter vs general population-based obesity using a table or figure.  
38  
39  
40  
41  
42

43  
44 Since obesity is a multidimensional issue, its prevalence may vary significantly from region  
45 to region, particularly in large countries. Thus, we will attempt to perform a comparison between  
46 the general adult population from the region or state from which study participants belong. US  
47 state data will be retrieved from the Centers for Disease Control and Prevention database  
48 (Behavioral Risk Factor Surveillance System). Brazil's regional comparison will be performed  
49 using information from the "*Vigilância de Doenças Crônicas por Inquérito Telefônico*" database.  
50  
51 For state or regional data from other countries, researchers will attempt to contact authors via e-  
52  
53  
54  
55  
56  
57  
58  
59  
60

1  
2  
3 mail to request information if such data is available and could be shared by the authors; a  
4  
5 maximum of two attempts will be performed, each one separated by one week. In case state or  
6  
7 regional data is already available in a manuscript from the same country, it will be used for  
8  
9 comparison.  
10

11 We will adopt a conservative approach to determine if prevalences are significantly  
12  
13 different between countries or when compared to national or regional data. Specifically, a 95%  
14  
15 confidence interval will be calculated, and data will be considered different when confidence  
16  
17 intervals do not overlap.  
18  
19  
20  
21

## 22 **Patient and Public Involvement**

23  
24 Patient and public were not involved directly in this study.  
25  
26  
27

## 28 **ETHICS AND DISSEMINATION**

29  
30 The systematic review does not require ethics clearance since published studies with non-  
31  
32 identifiable data will be used. The results of the systematic review will be disseminated via  
33  
34 publication in a peer-reviewed journal as well as through conference presentations.  
35  
36  
37  
38

## 39 **AUTHOR CONTRIBUTIONS**

40  
41 EMKVKS, LGGP and DLS contributed to the concept of this project, creating the search strategy,  
42  
43 refining the inclusion and exclusion criteria and producing this manuscript. EMKVKS drafted the  
44  
45 protocol. LGGP, DLS and EMKVKS revised the manuscript. LGGP and DLS provided oversight  
46  
47 for the project. All authors read and approved the final version of this manuscript.  
48  
49  
50

## 51 **FUNDING**

52  
53 No institution, funder or sponsor contributed to the development of the protocol. The authors have  
54  
55 not declared a specific grant for this research from any funding agency in the public, commercial  
56  
57  
58

1  
2  
3 or not-for-profit sectors. EMKVKS is a Skidmore College visiting researcher supported by  
4  
5 Coordenação de Aperfeiçoamento de Pessoal de Nível Superior – CAPES – Brazil (scholarship:  
6  
7 88881.188574/2018-01).  
8  
9

## 10 11 **ACKNOWLEDGEMENTS**

12  
13 We thank the reference librarians of the Biblioteca Central da Universidade de Brasília for their  
14  
15 assistance on the search terms and database selection.  
16  
17

## 18 19 **COMPETING INTERESTS**

20  
21 The authors have no competing interests.  
22  
23  
24

## 25 26 **PATIENT CONSENT**

27  
28 Not required.  
29  
30  
31  
32  
33  
34  
35  
36  
37  
38  
39  
40  
41  
42  
43  
44  
45  
46  
47  
48  
49  
50  
51  
52  
53  
54  
55  
56  
57  
58  
59  
60

## REFERENCES

- 1 Fahy RF, LeBlanc PR, Molis JL. Firefighter Fatalities in the United States-2017. Quincy, MA: : National Fire Protection Association 2018. <https://www.nfpa.org/-/media/Files/News-and-Research/Fire-statistics/Fire-service/osFFF.pdf> (accessed 20 Sep 2018).
- 2 Evarts B, Molis JL. United States Firefighter Injuries 2017. Quincy, MA: : NFPA Research 2018.
- 3 Soteriades ES, Smith DL, Tsismenakis AJ, *et al*. Cardiovascular disease in US firefighters: a systematic review. *Cardiol Rev* 2011;**19**:202–15. doi:10.1097/CRD.0b013e318215c105
- 4 Smith DL, Barr DA, Kales SN. Extreme sacrifice: sudden cardiac death in the US Fire Service. *Extreme Physiol Med* 2013;**2**:1.
- 5 Smith DL, DeBlois JP, Kales SN, *et al*. Cardiovascular Strain of Firefighting and the Risk of Sudden Cardiac Events. *Exerc Sport Sci Rev* Published Online First: 22 April 2016. doi:10.1249/JES.0000000000000081
- 6 Kales SN, Smith DL. Firefighting and the Heart: Implications for Prevention. *Circulation* 2017;**135**:1296–9. doi:10.1161/CIRCULATIONAHA.117.027018
- 7 Kales SN, Soteriades ES, Christoudias SG, *et al*. Firefighters and on-duty deaths from coronary heart disease: a case control study. *Environ Health Glob Access Sci Source* 2003;**2**:14. doi:10.1186/1476-069X-2-14
- 8 Korre M, Porto LGG, Farioli A, *et al*. Effect of Body Mass Index on Left Ventricular Mass in Career Male Firefighters. *Am J Cardiol* 2016;**118**:1769–73. doi:10.1016/j.amjcard.2016.08.058
- 9 Storer TW, Dolezal BA, Abrazado ML, *et al*. Firefighter health and fitness assessment: a call to action. *J Strength Cond Res Natl Strength Cond Assoc* 2014;**28**:661–71. doi:10.1519/JSC.0b013e31829b54da
- 10 Ode J, Knous J, Schlaff R, *et al*. Accuracy of body mass index in volunteer firefighters. *Occup Med Oxf Engl* 2014;**64**:193–7. doi:10.1093/occmed/kqt143
- 11 Porto LGG, Nogueira RM, Nogueira EC, *et al*. Agreement between BMI and body fat obesity definitions in a physically active population. *Arch Endocrinol Metab* 2016;**60**:515–25. doi:10.1590/2359-3997000000220
- 12 Strauß M, Foshag P, Przybyłek B, *et al*. Occupation and metabolic syndrome: is there correlation? A cross sectional study in different work activity occupations of German firefighters and office workers. *Diabetol Metab Syndr* 2016;**8**:57. doi:10.1186/s13098-016-0174-0
- 13 Jahnke SA, Poston WSC, Haddock CK, *et al*. Obesity and incident injury among career firefighters in the central United States. *Obes Silver Spring Md* 2013;**21**:1505–8. doi:10.1002/oby.20436

- 1  
2  
3 14 Poston WSC, Jitnarin N, Haddock CK, *et al.* Obesity and injury-related absenteeism in a  
4 population-based firefighter cohort. *Obes Silver Spring Md* 2011;**19**:2076–81.  
5 doi:10.1038/oby.2011.147  
6  
7 15 Smith DL, Haller JM, Korre M, *et al.* Pathoanatomic Findings Associated With Duty-Related  
8 Cardiac Death in US Firefighters: A Case-Control Study. *J Am Heart Assoc* 2018;**7**:e009446.  
9 doi:10.1161/JAHA.118.009446  
10  
11 16 Fahs CA, Smith DL, Horn GP, *et al.* Impact of excess body weight on arterial structure,  
12 function, and blood pressure in firefighters. *Am J Cardiol* 2009;**104**:1441–5.  
13 doi:10.1016/j.amjcard.2009.07.009  
14  
15 17 Kappus RM, Fahs CA, Smith D, *et al.* Obesity and overweight associated with increased  
16 carotid diameter and decreased arterial function in young otherwise healthy men. *Am J*  
17 *Hypertens* 2014;**27**:628–34. doi:10.1093/ajh/hpt152  
18  
19 18 Martin-Rodriguez E, Guillen-Grima F, Martí A, *et al.* Comorbidity associated with obesity in a  
20 large population: The APNA study. *Obes Res Clin Pract* 2015;**9**:435–47.  
21 doi:10.1016/j.orcp.2015.04.003  
22  
23 19 Nogueira EC, Porto LGG, Nogueira RM, *et al.* Body Composition is Strongly Associated With  
24 Cardiorespiratory Fitness in a Large Brazilian Military Firefighter Cohort: The Brazilian  
25 Firefighters Study. *J Strength Cond Res* 2016;**30**:33–8. doi:10.1519/JSC.0000000000001039  
26  
27 20 Lai C-C, Sun D, Cen R, *et al.* Impact of long-term burden of excessive adiposity and elevated  
28 blood pressure from childhood on adulthood left ventricular remodeling patterns: the Bogalusa  
29 Heart Study. *J Am Coll Cardiol* 2014;**64**:1580–7. doi:10.1016/j.jacc.2014.05.072  
30  
31 21 De Lorenzo A, Noce A, Moriconi E, *et al.* MOSH Syndrome (Male Obesity Secondary  
32 Hypogonadism): Clinical Assessment and Possible Therapeutic Approaches. *Nutrients*  
33 2018;**10**. doi:10.3390/nu10040474  
34  
35 22 Michalakis K, Mintziori G, Kaprara A, *et al.* The complex interaction between obesity,  
36 metabolic syndrome and reproductive axis: a narrative review. *Metabolism* 2013;**62**:457–78.  
37 doi:10.1016/j.metabol.2012.08.012  
38  
39 23 Aune D, Sen A, Prasad M, *et al.* BMI and all cause mortality: systematic review and non-linear  
40 dose-response meta-analysis of 230 cohort studies with 3.74 million deaths among 30.3  
41 million participants. *BMJ* 2016;**353**:i2156.  
42  
43 24 Cornell DJ, Gnacinski SL, Zamzow A, *et al.* Measures of health, fitness, and functional  
44 movement among firefighter recruits. *Int J Occup Saf Ergon JOSE* 2017;**23**:198–204.  
45 doi:10.1080/10803548.2016.1187001  
46  
47 25 Roberts MA, O’Dea J, Boyce A, *et al.* Fitness levels of firefighter recruits before and after a  
48 supervised exercise training program. *J Strength Cond Res* 2002;**16**:271–7.  
49  
50 26 Hollerbach BS, Jahnke SA, Poston WSC, *et al.* Examining a novel firefighter exercise training  
51 program on simulated fire ground test performance, cardiorespiratory endurance, and  
52 strength: a pilot investigation. *J Occup Med Toxicol Lond Engl* 2019;**14**:12.  
53 doi:10.1186/s12995-019-0232-2  
54  
55  
56  
57  
58  
59  
60

- 1
- 2
- 3 27 Jeong KS, Zhou J, Griffin SC, *et al.* MicroRNA Changes in Firefighters. *J Occup Environ Med*
- 4 2018;**60**:469–74. doi:10.1097/JOM.0000000000001307
- 5
- 6 28 Tsismenakis AJ, Christophi CA, Burrell JW, *et al.* The obesity epidemic and future
- 7 emergency responders. *Obes Silver Spring Md* 2009;**17**:1648–50. doi:10.1038/oby.2009.63
- 8
- 9 29 Ide CW. Fat future for firefighters? Changes in prevalence of obesity in Scottish local authority
- 10 firefighters. *Scott Med J* 2012;**57**:247. doi:10.1258/smj.2012.012114
- 11
- 12 30 Bonnell E, Huggins C, Huggins C, *et al.* Influences on Dietary Choices during Day versus
- 13 Night Shift in Shift Workers: A Mixed Methods Study. *Nutrients* 2017;**9**:193.
- 14 doi:10.3390/nu9030193
- 15
- 16 31 Kim M-J, Son K-H, Park H-Y, *et al.* Association between shift work and obesity among female
- 17 nurses: Korean Nurses' Survey. *BMC Public Health* 2013;**13**:1204. doi:10.1186/1471-2458-
- 18 13-1204
- 19
- 20 32 Antunes LC, Levandovski R, Dantas G, *et al.* Obesity and shift work: chronobiological
- 21 aspects. *Nutr Res Rev* 2010;**23**:155–68. doi:10.1017/S0954422410000016
- 22
- 23 33 Sun M, Feng W, Wang F, *et al.* Meta-analysis on shift work and risks of specific obesity types.
- 24 *Obes Rev Off J Int Assoc Study Obes* 2018;**19**:28–40. doi:10.1111/obr.12621
- 25
- 26 34 Soteriades ES, Hauser R, Kawachi I, *et al.* Obesity and cardiovascular disease risk factors in
- 27 firefighters: a prospective cohort study. *Obes Res* 2005;**13**:1756–63.
- 28 doi:10.1038/oby.2005.214
- 29
- 30 35 Elliot DL, Goldberg L, Kuehl KS, *et al.* The PHLAME (Promoting Healthy Lifestyles: Alternative
- 31 Models' Effects) firefighter study: outcomes of two models of behavior change. *J Occup*
- 32 *Environ Med* 2007;**49**:204–13. doi:10.1097/JOM.0b013e3180329a8d
- 33
- 34 36 Mozaffarian D, Hao T, Rimm EB, *et al.* Changes in diet and lifestyle and long-term weight
- 35 gain in women and men. *N Engl J Med* 2011;**364**:2392–404. doi:10.1056/NEJMoa1014296
- 36
- 37 37 Poston WSC, Haddock CK, Jahnke SA, *et al.* The prevalence of overweight, obesity, and
- 38 substandard fitness in a population-based firefighter cohort. *J Occup Environ Med*
- 39 2011;**53**:266–73. doi:10.1097/JOM.0b013e31820af362
- 40
- 41 38 Gurevich KG, Poston WSC, Anders B, *et al.* Obesity prevalence and accuracy of BMI-defined
- 42 obesity in Russian firefighters. *Occup Med Oxf Engl* 2017;**67**:61–3.
- 43 doi:10.1093/occmed/kqw136
- 44
- 45 39 Leischik R, Foshag P, Strauß M, *et al.* Aerobic Capacity, Physical Activity and Metabolic Risk
- 46 Factors in Firefighters Compared with Police Officers and Sedentary Clerks. *PLoS One*
- 47 2015;**10**:e0133113. doi:10.1371/journal.pone.0133113
- 48
- 49 40 Liberati A, Altman DG, Tetzlaff J, *et al.* The PRISMA statement for reporting systematic
- 50 reviews and meta-analyses of studies that evaluate healthcare interventions: explanation and
- 51 elaboration. *BMJ* 2009;**339**:b2700.
- 52
- 53
- 54
- 55
- 56
- 57
- 58
- 59
- 60

- 1  
2  
3 41 Shamseer L, Moher D, Clarke M, *et al*. Preferred reporting items for systematic review and  
4 meta-analysis protocols (PRISMA-P) 2015: elaboration and explanation. *BMJ*  
5 2015;**349**:g7647. doi:10.1136/bmj.g7647  
6  
7 42 Kanter R, Caballero B. Global gender disparities in obesity: a review. *Adv Nutr Bethesda Md*  
8 2012;**3**:491–8. doi:10.3945/an.112.002063  
9  
10 43 Garawi F, Devries K, Thorogood N, *et al*. Global differences between women and men in the  
11 prevalence of obesity: is there an association with gender inequality? *Eur J Clin Nutr*  
12 2014;**68**:1101–6. doi:10.1038/ejcn.2014.86  
13  
14 44 Azabdaftari N, Amani R, Taha Jalali M. Biochemical and nutritional indices as cardiovascular  
15 risk factors among Iranian firefighters. *Ann Clin Biochem* 2009;**46**:385–9.  
16 doi:10.1258/acb.2009.009026  
17  
18 45 Boyle MH. Guidelines for evaluating prevalence studies. *Evid Based Ment Health* 1998;**1**:37–  
19 9. doi:10.1136/ebmh.1.2.37  
20  
21 46 Higgins JPT, Altman DG, Gøtzsche PC, *et al*. The Cochrane Collaboration's tool for assessing  
22 risk of bias in randomised trials. *BMJ* 2011;**343**:d5928.  
23  
24 47 Stang A. Critical evaluation of the Newcastle-Ottawa scale for the assessment of the quality  
25 of nonrandomized studies in meta-analyses. *Eur J Epidemiol* 2010;**25**:603–5.  
26 doi:10.1007/s10654-010-9491-z  
27  
28 48 Jüni P, Witschi A, Bloch R, *et al*. The hazards of scoring the quality of clinical trials for meta-  
29 analysis. *JAMA* 1999;**282**:1054–60.  
30  
31 49 Munn Z, Moola S, Lisy K, *et al*. Methodological guidance for systematic reviews of  
32 observational epidemiological studies reporting prevalence and cumulative incidence data.  
33 *Int J Evid Based Healthc* 2015;**13**:147–53. doi:10.1097/XEB.0000000000000054  
34  
35 50 Newcombe RG. Two-sided confidence intervals for the single proportion: comparison of  
36 seven methods. *Stat Med* 1998;**17**:857–72.  
37  
38  
39  
40  
41  
42  
43  
44  
45  
46  
47  
48  
49  
50  
51  
52  
53  
54  
55  
56  
57  
58  
59  
60

## SUPPLEMENTARY FILE 1

| Eligibility Form – Please cross “yes” or “no” considering the content of the paper                                                     |     |    |
|----------------------------------------------------------------------------------------------------------------------------------------|-----|----|
|                                                                                                                                        | YES | NO |
| Does the study possess the main outcome of interest? (Obesity prevalence using BMI, %BF or WC)                                         |     |    |
| Does the study possess at least one group that may be analyzed or provide outcome of interest in which there are only firefighters in? |     |    |
| Are men and women in separate groups in the reported data?                                                                             |     |    |

*If all answers are yes, then the study is eligible.*

## SUPPLEMENTARY FILE 2

## Risk of bias assesment scale

|                                                                                                 | Yes                      | No                       | Unclear                  | Not applicable           |
|-------------------------------------------------------------------------------------------------|--------------------------|--------------------------|--------------------------|--------------------------|
| A. Was the sample frame appropriate to address the target population?                           | <input type="checkbox"/> | <input type="checkbox"/> | <input type="checkbox"/> | <input type="checkbox"/> |
| B. Were study participants sampled in an appropriate way?                                       | <input type="checkbox"/> | <input type="checkbox"/> | <input type="checkbox"/> | <input type="checkbox"/> |
| C. Was the sample size adequate?                                                                | <input type="checkbox"/> | <input type="checkbox"/> | <input type="checkbox"/> | <input type="checkbox"/> |
| D. Were the study subjects and the setting described in detail?                                 | <input type="checkbox"/> | <input type="checkbox"/> | <input type="checkbox"/> | <input type="checkbox"/> |
| E. Was the data analysis conducted with sufficient coverage of the identified sample?           | <input type="checkbox"/> | <input type="checkbox"/> | <input type="checkbox"/> | <input type="checkbox"/> |
| F. Were valid methods used for the identification of the condition?                             | <input type="checkbox"/> | <input type="checkbox"/> | <input type="checkbox"/> | <input type="checkbox"/> |
| G. Was the condition measure in a standard, reliable way for all participants?                  | <input type="checkbox"/> | <input type="checkbox"/> | <input type="checkbox"/> | <input type="checkbox"/> |
| H. Was there appropriate statistical analysis?                                                  | <input type="checkbox"/> | <input type="checkbox"/> | <input type="checkbox"/> | <input type="checkbox"/> |
| I. Was the response rate adequate, and if not, was the low response rate managed appropriately? | <input type="checkbox"/> | <input type="checkbox"/> | <input type="checkbox"/> | <input type="checkbox"/> |

# REPORTING CHECKLIST FOR PROTOCOL OF A SYSTEMATIC REVIEW.

## PRISMA-P (Preferred Reporting Items for Systematic review and Meta-Analysis Protocols) 2015 checklist: recommended items to address in a systematic review protocol

|                           | Reporting Item                                                                                                                                                                                     | Page Number |
|---------------------------|----------------------------------------------------------------------------------------------------------------------------------------------------------------------------------------------------|-------------|
| Identification            | #1a Identify the report as a protocol of a systematic review                                                                                                                                       | 1           |
| Update                    | #1b If the protocol is for an update of a previous systematic review, identify as such                                                                                                             | N/A         |
|                           | #2 If registered, provide the name of the registry (such as PROSPERO) and registration number                                                                                                      | 3           |
| Contact                   | #3a Provide name, institutional affiliation, e-mail address of all protocol authors; provide physical mailing address of corresponding author                                                      | 8           |
| Contribution              | #3b Describe contributions of protocol authors and identify the guarantor of the review                                                                                                            | 13          |
|                           | #4 If the protocol represents an amendment of a previously completed or published protocol, identify as such and list changes; otherwise, state plan for documenting important protocol amendments | N/A         |
| Sources                   | #5a Indicate sources of financial or other support for the review                                                                                                                                  | 13-14       |
| Sponsor                   | #5b Provide name for the review funder and / or sponsor                                                                                                                                            | 13-14       |
| Role of sponsor or funder | #5c Describe roles of funder(s), sponsor(s), and / or institution(s), if any, in developing the protocol                                                                                           | N/A         |
| Rationale                 | #6 Describe the rationale for the review in the context of what is already known                                                                                                                   | 5-7         |
| Objectives                | #7 Provide an explicit statement of the question(s) the review will address with reference to participants, interventions, comparators, and outcomes (PICO)                                        | 7           |

|    |                                         |      |                                                                                                                                                                                                                               |       |
|----|-----------------------------------------|------|-------------------------------------------------------------------------------------------------------------------------------------------------------------------------------------------------------------------------------|-------|
| 1  | Eligibility criteria                    | #8   | Specify the study characteristics (such as PICO, study design, setting, time frame) and report characteristics (such as years considered, language, publication status) to be used as criteria for eligibility for the review | 9,11  |
| 2  |                                         |      |                                                                                                                                                                                                                               |       |
| 3  |                                         |      |                                                                                                                                                                                                                               |       |
| 4  |                                         |      |                                                                                                                                                                                                                               |       |
| 5  |                                         |      |                                                                                                                                                                                                                               |       |
| 6  |                                         |      |                                                                                                                                                                                                                               |       |
| 7  |                                         |      |                                                                                                                                                                                                                               |       |
| 8  | Information sources                     | #9   | Describe all intended information sources (such as electronic databases, contact with study authors, trial registers or other grey literature sources) with planned dates of coverage                                         | 8-10  |
| 9  |                                         |      |                                                                                                                                                                                                                               |       |
| 10 |                                         |      |                                                                                                                                                                                                                               |       |
| 11 |                                         |      |                                                                                                                                                                                                                               |       |
| 12 |                                         |      |                                                                                                                                                                                                                               |       |
| 13 | Search strategy                         | #10  | Present draft of search strategy to be used for at least one electronic database, including planned limits, such that it could be repeated                                                                                    | 8     |
| 14 |                                         |      |                                                                                                                                                                                                                               |       |
| 15 |                                         |      |                                                                                                                                                                                                                               |       |
| 16 |                                         |      |                                                                                                                                                                                                                               |       |
| 17 |                                         |      |                                                                                                                                                                                                                               |       |
| 18 | Study records - data management         | #11a | Describe the mechanism(s) that will be used to manage records and data throughout the review                                                                                                                                  | 9-10  |
| 19 |                                         |      |                                                                                                                                                                                                                               |       |
| 20 |                                         |      |                                                                                                                                                                                                                               |       |
| 21 |                                         |      |                                                                                                                                                                                                                               |       |
| 22 | Study records - selection process       | #11b | State the process that will be used for selecting studies (such as two independent reviewers) through each phase of the review (that is, screening, eligibility and inclusion in meta-analysis)                               | 9-10  |
| 23 |                                         |      |                                                                                                                                                                                                                               |       |
| 24 |                                         |      |                                                                                                                                                                                                                               |       |
| 25 |                                         |      |                                                                                                                                                                                                                               |       |
| 26 |                                         |      |                                                                                                                                                                                                                               |       |
| 27 |                                         |      |                                                                                                                                                                                                                               |       |
| 28 |                                         |      |                                                                                                                                                                                                                               |       |
| 29 | Study records - data collection process | #11c | Describe planned method of extracting data from reports (such as piloting forms, done independently, in duplicate), any processes for obtaining and confirming data from investigators                                        | 9-10  |
| 30 |                                         |      |                                                                                                                                                                                                                               |       |
| 31 |                                         |      |                                                                                                                                                                                                                               |       |
| 32 |                                         |      |                                                                                                                                                                                                                               |       |
| 33 |                                         |      |                                                                                                                                                                                                                               |       |
| 34 | Data items                              | #12  | List and define all variables for which data will be sought (such as PICO items, funding sources), any pre-planned data assumptions and simplifications                                                                       | 10-11 |
| 35 |                                         |      |                                                                                                                                                                                                                               |       |
| 36 |                                         |      |                                                                                                                                                                                                                               |       |
| 37 |                                         |      |                                                                                                                                                                                                                               |       |
| 38 |                                         |      |                                                                                                                                                                                                                               |       |
| 39 |                                         |      |                                                                                                                                                                                                                               |       |
| 40 | Outcomes and prioritization             | #13  | List and define all outcomes for which data will be sought, including prioritization of main and additional outcomes, with rationale                                                                                          | 10-11 |
| 41 |                                         |      |                                                                                                                                                                                                                               |       |
| 42 |                                         |      |                                                                                                                                                                                                                               |       |
| 43 |                                         |      |                                                                                                                                                                                                                               |       |
| 44 |                                         |      |                                                                                                                                                                                                                               |       |
| 45 | Risk of bias in individual studies      | #14  | Describe anticipated methods for assessing risk of bias of individual studies, including whether this will be done at the outcome or study level, or both; state how this information will be used in data synthesis          | 11-12 |
| 46 |                                         |      |                                                                                                                                                                                                                               |       |
| 47 |                                         |      |                                                                                                                                                                                                                               |       |
| 48 |                                         |      |                                                                                                                                                                                                                               |       |
| 49 |                                         |      |                                                                                                                                                                                                                               |       |
| 50 |                                         |      |                                                                                                                                                                                                                               |       |
| 51 |                                         |      |                                                                                                                                                                                                                               |       |
| 52 | Data synthesis                          | #15a | Describe criteria under which study data will be quantitatively synthesised                                                                                                                                                   | 12-13 |
| 53 |                                         |      |                                                                                                                                                                                                                               |       |
| 54 |                                         |      |                                                                                                                                                                                                                               |       |
| 55 |                                         |      |                                                                                                                                                                                                                               |       |
| 56 |                                         | #15b | If data are appropriate for quantitative synthesis, describe planned summary measures, methods of handling data and methods of combining data from studies, including any                                                     | N/A   |
| 57 |                                         |      |                                                                                                                                                                                                                               |       |
| 58 |                                         |      |                                                                                                                                                                                                                               |       |
| 59 |                                         |      |                                                                                                                                                                                                                               |       |
| 60 |                                         |      |                                                                                                                                                                                                                               |       |

planned exploration of consistency (such as I<sup>2</sup>, Kendall's  $\tau$ )

|    |               |                                                                 |       |
|----|---------------|-----------------------------------------------------------------|-------|
| 1  |               |                                                                 |       |
| 2  |               |                                                                 |       |
| 3  |               | #15c                                                            | N/A   |
| 4  |               | Describe any proposed additional analyses (such as              |       |
| 5  |               | sensitivity or subgroup analyses, meta-regression)              |       |
| 6  |               |                                                                 |       |
| 7  |               | #15d                                                            | 12-13 |
| 8  |               | If quantitative synthesis is not appropriate, describe the type |       |
| 9  |               | of summary planned                                              |       |
| 10 | Meta-bias(es) | #16                                                             | N/A   |
| 11 |               | Specify any planned assessment of meta-bias(es) (such as        |       |
| 12 |               | publication bias across studies, selective reporting within     |       |
| 13 |               | studies)                                                        |       |
| 14 |               |                                                                 |       |
| 15 | Confidence in | #17                                                             | N/A   |
| 16 | cumulative    | Describe how the strength of the body of evidence will be       |       |
| 17 | evidence      | assessed (such as GRADE)                                        |       |
| 18 |               |                                                                 |       |
| 19 |               |                                                                 |       |

The PRISMA-P checklist is distributed under the terms of the Creative Commons Attribution License CC-BY 4.0. This checklist was completed on 20. March 2019 using <https://www.goodreports.org/>, a tool made by the [EQUATOR Network](#) in collaboration with [Penelope.ai](#)

# BMJ Open

## Worldwide prevalence of obesity among firefighters: a systematic review protocol

|                                 |                                                                                                                                                                                                                                                                                                                                                                                                                                                                                                                  |
|---------------------------------|------------------------------------------------------------------------------------------------------------------------------------------------------------------------------------------------------------------------------------------------------------------------------------------------------------------------------------------------------------------------------------------------------------------------------------------------------------------------------------------------------------------|
| Journal:                        | <i>BMJ Open</i>                                                                                                                                                                                                                                                                                                                                                                                                                                                                                                  |
| Manuscript ID                   | bmjopen-2019-031282.R2                                                                                                                                                                                                                                                                                                                                                                                                                                                                                           |
| Article Type:                   | Protocol                                                                                                                                                                                                                                                                                                                                                                                                                                                                                                         |
| Date Submitted by the Author:   | 03-Dec-2019                                                                                                                                                                                                                                                                                                                                                                                                                                                                                                      |
| Complete List of Authors:       | Melo Keene von Koenig Soares, Edgard; Universidade de Brasilia, Faculdade de Educação Física; Skidmore College, Health and Human Physiological Sciences/ First Responder Health and Safety Laboratory<br>Smith, Denise; Skidmore College, Health and Human Physiological Sciences/ First Responder Health and Safety Laboratory<br>Grossi Porto, Luiz Guilherme; Universidade de Brasilia, Faculdade de Educação Física; Harvard University T H Chan School of Public Health, Department of Environmental Health |
| <b>Primary Subject Heading</b>: | Public health                                                                                                                                                                                                                                                                                                                                                                                                                                                                                                    |
| Secondary Subject Heading:      | Occupational and environmental medicine, Epidemiology, Public health                                                                                                                                                                                                                                                                                                                                                                                                                                             |
| Keywords:                       | Fire and Rescue Personnel, Abdominal Fat, Overweight, PUBLIC HEALTH                                                                                                                                                                                                                                                                                                                                                                                                                                              |
|                                 |                                                                                                                                                                                                                                                                                                                                                                                                                                                                                                                  |

SCHOLARONE™  
Manuscripts

1  
2  
3 **TITLE:** Worldwide prevalence of obesity among firefighters: a systematic review protocol  
4  
5  
6

7 **AUTHORS:** Edgard MKVK Soares<sup>1,2</sup>, Denise L Smith<sup>1</sup>, Luiz GG Porto<sup>2</sup>.  
8

9 1 – Health and Human Physiological Sciences, Skidmore College, Saratoga Springs-NY, USA  
10

11 2 – Faculdade de Educação Física, Universidade de Brasília, Brasília-DF, Brazil  
12

13 Corresponding author: Luiz GG Porto  
14  
15

16  
17  
18 **Corresponding author:** Prof. Luiz Guilherme Grossi Porto  
19

- 20 • **Address:** Campus Universitário Darcy Ribeiro
- 21
- 22 • **Brasília** – DF, Brazil – zip code: 70910-900
- 23
- 24 • **Phone:** +55 (61) 3107-2525; fax: +55 (61) 3107-2525
- 25
- 26 • **E-mail:** lgporto@hsph.harvard.edu/ luizggporto@gmail.com  
27

28  
29 **Word count:** 2,350  
30

31 **Number of Figures:**0  
32

33 **Number of Tables:** 1  
34

35 **Number of References:** 51  
36

37 **Number of Supplementary Files:** 2  
38  
39  
40  
41  
42  
43  
44  
45  
46  
47  
48  
49  
50  
51  
52  
53  
54  
55  
56  
57  
58  
59  
60

## ABSTRACT

### Introduction

Obesity may interfere with job performance and increase the risk of injury during firefighting activity. Obesity also has many deleterious effects on health indices and is associated with higher all-cause mortality. Studies report a high prevalence of obesity in the Fire Service. Also, firefighters' work schedule (12-24h shifts) and food availability during night shifts may be related to weight gain. Studies in American firefighters have shown annual weight gain between 0.5-1.5 kg. This study aims to report the obesity prevalence in the Fire Service to describe how it varies based on country and region, job status, type of firefighter and gender.

### Methods and analysis

The main outcome evaluated will be obesity prevalence. We will systematically search the literature databases PubMed, Medline, Web of Science, Sportdiscus, Academic Search Premier, CINAHL, SciTech Premium Collection, Sports Medicine & Education Index, Research Library, and Scopus. One reviewer will perform the search. Two independent reviewers will select studies, extract data from eligible studies, and evaluate their methodological and reporting quality. Agreement between reviewers will be measured using Cohen's Kappa. Other data of interest will include age, body mass index, body fat percentage, job status (career, volunteer or military), years of service and type of firefighter (e.g., structural, wildland firefighter). We will produce a narrative summary of our findings. Tables will be generated to summarise data.

### Ethics and dissemination

This systematic review does not require ethics clearance since published studies with non-identifiable data will be used. The results of the systematic review will be disseminated via publication in a peer-reviewed journal and through conference presentations

### Registration and review status

1  
2  
3  
4  
5  
6  
7  
8  
9  
10  
11  
12  
13  
14  
15  
16  
17  
18  
19  
20  
21  
22  
23  
24  
25  
26  
27  
28  
29  
30  
31  
32  
33  
34  
35  
36  
37  
38  
39  
40  
41  
42  
43  
44  
45  
46  
47  
48  
49  
50  
51  
52  
53  
54  
55  
56  
57  
58  
59  
60

This systematic review protocol has been registered at PROSPERO (CRD42019129122).  
The systematic review process will start once the protocol has gone through full external peer review at the BMJ Open (estimated date: 12 January 2020).

For peer review only

## Keywords

Fire and Rescue Personnel, Abdominal Fat, Overweight, Public Health

## ARTICLE SUMMARY

### Strengths and limitations of this study

- The first systematic review of worldwide obesity prevalence among firefighters.
- A comprehensive synthesis of worldwide obesity prevalence, including a narrative comparison with the country of origin of the study using a standardised risk of bias tool.
- Study selection and risk of bias assessment will be performed independently by two researchers, which will ensure that all relevant studies are included without personal biases.
- A potential limitation of this review may be a small number of studies available for countries other than the United States.

## INTRODUCTION

1  
2  
3  
4  
5  
6  
7  
8  
9  
10  
11  
12  
13  
14  
15  
16  
17  
18  
19  
20  
21  
22  
23  
24  
25  
26  
27  
28  
29  
30  
31  
32  
33  
34  
35  
36  
37  
38  
39  
40  
41  
42  
43  
44  
45  
46  
47  
48  
49  
50  
51  
52  
53  
54  
55  
56  
57  
58  
59  
60

Firefighters perform critical public safety work. Considering all the different occupational hazards firefighters face, it is surprising to many that the leading cause of duty-related death among United States (US) firefighters is sudden cardiac death (SCD). In 2017, SCD accounted for almost half of on-duty deaths in the US, and SCD has been responsible for about 43% of on-duty fatalities for the last ten years [1]. Furthermore, for every fatal on-duty cardiac event, there are an estimated 20 nonfatal on-duty cardiovascular events [2]. Theoretical models have been proposed in order to conceptualise how firefighting interacts with individual risk factors like obesity to increase the risk of SCD [3–6].

Clearly, the underlying health of firefighters is one of the important aspects associated with cardiovascular death in the Fire Service. Also, individual risk factors are critical factors in determining the risk of SCD. Research has consistently found a high prevalence of cardiovascular disease risk factors among firefighters. Obesity increases the odds of a fatal on-duty coronary heart disease event by 1.5-6.6 times [7] and is highly associated with cardiomegaly in firefighters [8]. Studies report obesity prevalence in the US ranging from 22% [9] to 60% [10] depending on the region, age and type of firefighter (career or volunteer). Outside of the US, lower estimates of obesity have been reported. In Brazil, obesity rates of less than 15% have been reported for military based firefighters [11,12].

Obesity may interfere with job performance and increase the risk of injury during firefighting activity [13–15]. Obesity also has many deleterious effects on health indices, including: reduced arterial function [16,17], glucose intolerance, dyslipidemia, type 2 diabetes, hypertension, osteoarthritis [18], low cardiorespiratory fitness [19], pathological remodeling of the heart [20], endocrine disorders [21,22], and is associated with higher all-cause mortality [23].

Several studies have reported that US firefighter recruits begin their career with an elevated BMI [24–26]. Few studies report the actual obesity prevalence within firefighter recruits. One study performed in Tucson, Arizona reported an obesity prevalence of 15.6% in firefighter

1  
2  
3 recruits [27]. A separate study from Massachusetts that included both firefighter and ambulance  
4 personnel recruits found a prevalence of 33% [28]. Research has also shown that a significant  
5 weight gain occurs during a firefighter's career [28,29]. A recent case-control study which  
6 retrospectively examined all available autopsy records of US firefighters between 1999 and 2014  
7 has shown obesity prevalence estimates as high as 59.2% among firefighters who died due to  
8 cardiac issues (cardiac cases) and 47.7% among noncardiac trauma controls [15].  
9

10  
11  
12  
13  
14  
15  
16  
17  
18  
19  
20  
21  
22  
23  
24  
25  
26  
27  
28  
29  
30  
31  
32  
33  
34  
35  
36  
37  
38  
39  
40  
41  
42  
43  
44  
45  
46  
47  
48  
49  
50  
51  
52  
53  
54  
55  
56  
57  
58  
59  
60  
Firefighters' work schedule (12-24 hour work shifts) and lower availability of healthy food  
during night shifts may be an important contribution to weight gain [30] as shift-working by itself  
is considered an independent risk factor for obesity [31–33]. Some US cohort studies report  
firefighters' annual weight gain ranging from 0.5 kg [34] to 1.5 kg [35]. Ide [29] reports similar  
values for Scottish firefighters, with a mean gain of 1.5 kg/year. This could represent a gain of 5  
kg to 15 kg of weight in 10 years of service. Data from the Health Professionals Follow-Up Study  
show a significant weight gain of 0.2 kg every year [36], a considerably lower value compared to  
those in firefighters. These facts raise an interesting question, specifically, do firefighters have a  
high obesity prevalence because of the population of origin, i.e. those who become firefighters  
(US population) have a large proportion of men with obesity, or does firefighting lead to obesity,  
or is it associated with the burden of their type of service.

Poston et al., [37] analysed the obesity prevalence in 677 firefighters and compared them  
to the national obesity prevalence (US adults). While prevalence was similar, in a separate  
analysis, volunteers seemed to possess a higher prevalence of obesity compared to US adults  
and career firefighters. Other studies show similarities between the firefighters and their original  
population [19,38]. In contrast, German firefighters seem to be more fit than sedentary clerks and  
police officers from the same region [39].

There is an important need to understand the obesity prevalence in the Fire Service due  
to its relation to health and job performance. Understanding if this is a phenomenon isolated to  
US firefighters or occurring globally. It is also important to understand potential factors that could

1  
2  
3 be associated with such phenomenon, from ageing to job status. An increased understanding of  
4 obesity would be important for fire service leaders and policymakers in order to create effective  
5 strategies to decrease obesity and lead to better health and job performance in the Fire Service.  
6  
7 Thus, this study aims to (1) report the obesity prevalence in the Fire Service (2) to describe how  
8 it varies based on country and region, job status, type of firefighter and gender.  
9  
10  
11  
12  
13  
14  
15

## 16 **Objectives**

17 The present study intends to address the following questions:

- 18 • What is the prevalence of obesity among firefighters around the world?
- 19
- 20 • Is the obesity prevalence among firefighters different from their own original
- 21 population?
- 22
- 23 • Does the job status affect firefighters' obesity prevalence (volunteer, career, military)?
- 24
- 25 • Does the type of firefighter affect obesity prevalence (structural, wildland, industrial)?
- 26
- 27 • Does age have an important influence on obesity prevalence?
- 28
- 29 • Has firefighters' obesity prevalence changed over the years, i.e. do older studies report
- 30 an obesity prevalence different from more recent ones?
- 31
- 32
- 33
- 34
- 35
- 36
- 37
- 38

## 39 **METHODS AND ANALYSIS**

40 The systematic review process will start once the protocol has been through full external peer  
41 review at the BMJ Open (estimated date: 12 January 2020).  
42  
43  
44  
45  
46  
47

### 48 **Protocol and registration**

49 The methods for this systematic review have been developed according to  
50 recommendations from the Preferred Reporting Items for Systematic Reviews and Meta-Analyses  
51 (PRISMA)[40] and Preferred Reporting Items for Systematic Review and Meta-Analysis Protocols  
52  
53  
54  
55  
56  
57  
58  
59  
60

(PRISMA-P)[41] statements. This protocol has been registered in the International Prospective Register of Systematic Reviews (PROSPERO) under the registration number CRD42019129122.

## Search strategy

The following electronic databases will be searched:

- PubMed
- Medline
- Web of Science
- Academic Search Premier (EBSCO)
- Sportdiscus (EBSCO)
- CINAHL (EBSCO)
- SciTech Premium Collection (ProQuest)
- Sports Medicine & Education Index (ProQuest)
- Research Library (ProQuest)
- Scopus

We will search for studies reporting data on firefighters' BMI, body fat percentage (BF%) and obesity prevalence using the following search term:

- ((Firefighter OR Firefighting OR Firefighters OR Firefighter's OR Firefighters') AND (obesity OR overweight OR "excess weight" OR adiposity OR waist OR "body mass index" OR bmi OR "body fat"))

There will be no time limit, i.e. studies may have been published in any year. Searches will be limited to peer-reviewed journals. Grey literature will not be included.

## Eligibility criteria

1  
2  
3 In order to be included in this study, studies must report data from firefighters as a unique  
4 group. Data from other professionals (e.g. police officers) should constitute a different, separate  
5 group. Studies may have a cross-sectional or longitudinal design. If a study has multiple time  
6 points in the same cohort, we will use the most recent time point for the prevalence report but will  
7 use other time points to address our last objective. Although we are not interested in interventions,  
8 intervention studies will also be included, and pre-intervention data will be used instead of post.  
9 Data from males and females will be analysed separately due to a sex-related difference in obesity  
10 prevalence[42,43]. Although the search will be performed in English, we will include studies  
11 written in any language; which will be translated when necessary to ensure eligibility, and for data  
12 extraction when eligibility is confirmed. In cases where it is impossible to translate the studies, it  
13 will be noted, and we will report the number of studies in this situation.  
14  
15

16 Prevalence data must be calculated from body mass index (BMI), per cent body fat (%BF)  
17 or waist circumference. BMI prevalence data that originates from self-reported height and weight  
18 will also be included since they are reasonably accurate reflections of their measured values [44].  
19 The method employed to measure body fat percentage will also be recorded to account for  
20 possible differences among methods. Although other variables may be used to define obesity,  
21 e.g., waist-to-height ratio; these indices are probably not often used in firefighter studies; also,  
22 their agreement with traditional indices are unknown and may overestimate obesity in the Fire  
23 Service[45]. Thus, the authors decided to include only obesity prevalence data that used BMI,  
24 %BF and waist circumference. To increase objectivity, reviewers will use a simple form to assess  
25 eligibility (Supplementary File 1).  
26  
27  
28  
29  
30  
31  
32  
33  
34  
35  
36  
37  
38  
39  
40  
41  
42  
43  
44  
45  
46  
47  
48  
49

### 50 **Data extraction**

51 One reviewer will perform the literature search; results will be saved in a reference  
52 manager; duplicates will be eliminated using the provided software tools. Remaining files will be  
53 shared with the second reviewer. The two reviewers will independently screen titles and abstracts  
54  
55  
56  
57  
58  
59  
60

1  
2  
3 for eligibility. Full texts will then be obtained for those that meet inclusion criteria or are uncertain.  
4  
5 The full text will then be screened, and reviewers will independently decide whether the paper  
6  
7 meets all requirements for inclusion in the study. Reviewers will record the reasons for excluding  
8  
9 studies. At the end of the independent assessment, results from the two reviewers will be shared,  
10  
11 and the agreement between the two reviewers will be assessed using kappa statistics. If  
12  
13 discrepancies occur, they will be discussed between the two reviewers. If they cannot reach  
14  
15 consensus, one of the senior authors (LGGP or DLS) will resolve the issue. Investigators will not  
16  
17 be blind to the journal titles or institutions or study authors.  
18  
19

20 In order to avoid double-counting, when there are multiple studies from the same cohort,  
21  
22 the study with the largest sample size will be used. If the sample size does not vary, the most  
23  
24 recent paper will be used. We will also look for similarities (sample size, firefighter headquarter  
25  
26 and mean age) between studies of the same author or group to ensure they are not the same  
27  
28 sample.  
29

30 Both reviewers will independently use a standardised excel spreadsheet to extract and  
31  
32 store data of interest (Table 1) from the studies chosen to be included in the review. An agreement  
33  
34 analysis will be performed between reviewers for each data of interest using kappa statistics to  
35  
36 evaluate if both reviewers have the same data present in the spreadsheet. Both spreadsheets will  
37  
38 be united in one excel file, and data of interest will be compared between spreadsheets using an  
39  
40 IF function, e.g. =IF(A1=B1;"0";"1"). Reviewers will discuss differences until spreadsheets contain  
41  
42 the same information. In the remote possibility of any difficulties in this process, one of the senior  
43  
44 authors (LGGP or DLS) will be contacted in order to solve the issue  
45  
46

47 Authors of included or screened articles may be contacted to obtain additional information,  
48  
49 i.e., in case important information is missing from the manuscript, but authors are likely to have it.  
50  
51 One reviewer will send an e-mail to the corresponding author's e-mail address, based on  
52  
53 information in the article; a maximum of two attempts will be made, each separated by one week.  
54  
55

56 Data of interest are presented in Table 1.  
57  
58

Table 1. Data of interest that will be sought from eligible studies

|                                        |                                                                                                                                 |
|----------------------------------------|---------------------------------------------------------------------------------------------------------------------------------|
| <b>Author details:</b>                 | Name of first author, journal where the article was published, language and publication year.                                   |
| <b>Study characteristics:</b>          | Study design, sampling method, data collection period, and time of data collection (e.g. a 2016 study may have data from 2009). |
| <b>Participants' characteristics:</b>  | Age, BMI, %BF and waist circumference.                                                                                          |
| <b>Firefighters' characteristics:</b>  | Job status (volunteer, career or military), years of service, type of firefighter (e.g. industrial, hazard material, wildland)  |
| <b>Outcomes:</b>                       | Obesity and overweight prevalence                                                                                               |
| <b>Methods used to define obesity:</b> | BMI, %BF or waist circumference.                                                                                                |

### Quality assessment

Quality assessments will be performed independently by both reviewers. We will focus our analysis on the risk of bias since manuscript “quality” may be an ambiguous term and different interpretations of it can significantly impact reviews and meta-analysis results [40,46–49].

We will perform a risk of bias assessment using the Joanna Briggs Institute’s critical appraisal checklist for studies reporting prevalence data as suggested by Munn et al.,[50] which contains nine simple questions (Supplementary File 2) that evaluate risk of bias in topics such as: sampling frame, sample size, data analysis, validity of the methods and response rate i.e. the proportion of individuals who agreed to participate from all who were invited.

In order to improve agreement, objectivity and reproducibility of the reviewers, we will perform training with the reviewers before the study is initiated. In case of disagreement, the two

1  
2  
3 reviewers will discuss their opinions. If they are not able to reach a consensus, the senior authors  
4  
5 (LGGP or DLS) will resolve this difference.  
6  
7  
8

## 9 **Data analysis**

10  
11 Data will be narratively synthesised. Results will be reported according to the PRISMA  
12 statement[40]. Evidence tables will be generated to descriptively summarise the included studies  
13 and results according to our objectives. We will compare obesity prevalence based on countries  
14 and regions, job status (volunteer, career or military), type of firefighter (e.g. industrial, structural  
15 material, wildland) and gender. Confidence intervals for the prevalence will be computed using  
16 the data extracted from the articles [51]. We will also evaluate how frequently a specific  
17 prevalence value is reported by studies in a worldwide and country analysis, e.g. in the US, 50%  
18 of the studies report an obesity prevalence greater than 33%. Depending on the heterogeneity of  
19 risk of bias in the studies, a secondary comparison will be made between those with lower and  
20 higher risk.  
21  
22  
23  
24  
25  
26  
27  
28  
29  
30  
31

32  
33 In order to compare firefighter data with the general population, we will utilise the World  
34 Health Organization's (WHO) age-standardised obesity prevalence that is available for almost all  
35 countries. In case a study already provides an age-standardised obesity prevalence of its country  
36 of origin[38,39], this data will have priority over the WHO data. When possible, we will compare  
37 firefighter vs general population-based obesity using a table or figure.  
38  
39  
40  
41  
42

43  
44 Since obesity is a multidimensional issue, its prevalence may vary significantly from region  
45 to region, particularly in large countries. Thus, we will attempt to perform a comparison between  
46 the general adult population from the region or state from which study participants belong. US  
47 state data will be retrieved from the Centers for Disease Control and Prevention database  
48 (Behavioral Risk Factor Surveillance System). Brazil's regional comparison will be performed  
49 using information from the "*Vigilância de Doenças Crônicas por Inquérito Telefônico*" database.  
50  
51 For state or regional data from other countries, researchers will attempt to contact authors via e-  
52  
53  
54  
55  
56  
57  
58  
59  
60

1  
2  
3 mail to request information if such data is available and could be shared by the authors; a  
4  
5 maximum of two attempts will be performed, each one separated by one week. In case state or  
6  
7 regional data is already available in a manuscript from the same country, it will be used for  
8  
9 comparison.  
10

11 We will adopt a conservative approach to determine if prevalences are significantly  
12  
13 different between countries or when compared to national or regional data. Specifically, a 95%  
14  
15 confidence interval will be calculated, and data will be considered different when confidence  
16  
17 intervals do not overlap.  
18  
19  
20  
21

## 22 **Patient and Public Involvement**

23  
24 Patient and public were not involved directly in this study.  
25  
26  
27

## 28 **ETHICS AND DISSEMINATION**

29  
30 The systematic review does not require ethics clearance since published studies with non-  
31  
32 identifiable data will be used. The results of the systematic review will be disseminated via  
33  
34 publication in a peer-reviewed journal as well as through conference presentations.  
35  
36  
37  
38

## 39 **AUTHOR CONTRIBUTIONS**

40  
41 EMKVKS, LGGP and DLS contributed to the concept of this project, creating the search strategy,  
42  
43 refining the inclusion and exclusion criteria and producing this manuscript. EMKVKS drafted the  
44  
45 protocol. LGGP, DLS and EMKVKS revised the manuscript. LGGP and DLS provided oversight  
46  
47 for the project. All authors read and approved the final version of this manuscript.  
48  
49  
50

## 51 **FUNDING**

52  
53 No institution, funder or sponsor contributed to the development of the protocol. The authors have  
54  
55 not declared a specific grant for this research from any funding agency in the public, commercial  
56  
57  
58

1  
2  
3 or not-for-profit sectors. EMKVKS is a Skidmore College visiting researcher supported by  
4  
5 Coordenação de Aperfeiçoamento de Pessoal de Nível Superior – CAPES – Brazil (scholarship:  
6  
7 88881.188574/2018-01). This study project was supported by Fundação de Apoio à Pesquisa do  
8  
9 Distrito Federal - FAPDF, grant: demanda espontânea 3/2016 - n° 00193.001467/2016. This  
10  
11 study was financed in part by the Coordenação de Aperfeiçoamento de Pessoal de Nível Superior  
12  
13 - Brasil (CAPES) - Finance Code 001: EMKVKS was supported by a CAPES scholarship.  
14  
15

### 16 17 18 **ACKNOWLEDGEMENTS**

19  
20 We thank the reference librarians of the Biblioteca Central da Universidade de Brasília for their  
21  
22 assistance on the search terms and database selection.  
23  
24

### 25 26 **COMPETING INTERESTS**

27  
28 The authors have no competing interests.  
29  
30

### 31 32 **PATIENT CONSENT**

33  
34 Not required.  
35  
36  
37  
38  
39  
40  
41  
42  
43  
44  
45  
46  
47  
48  
49  
50  
51  
52  
53  
54  
55  
56  
57  
58  
59  
60

## REFERENCES

- 1 Fahy RF, LeBlanc PR, Molis JL. Firefighter Fatalities in the United States-2017. Quincy, MA: : National Fire Protection Association 2018. <https://www.nfpa.org/-/media/Files/News-and-Research/Fire-statistics/Fire-service/osFFF.pdf> (accessed 20 Sep 2018).
- 2 Evarts B, Molis JL. United States Firefighter Injuries 2017. Quincy, MA: : NFPA Research 2018.
- 3 Soteriades ES, Smith DL, Tsismenakis AJ, *et al*. Cardiovascular disease in US firefighters: a systematic review. *Cardiol Rev* 2011;**19**:202–15. doi:10.1097/CRD.0b013e318215c105
- 4 Smith DL, Barr DA, Kales SN. Extreme sacrifice: sudden cardiac death in the US Fire Service. *Extreme Physiol Med* 2013;**2**:1.
- 5 Smith DL, DeBlois JP, Kales SN, *et al*. Cardiovascular Strain of Firefighting and the Risk of Sudden Cardiac Events. *Exerc Sport Sci Rev* Published Online First: 22 April 2016. doi:10.1249/JES.0000000000000081
- 6 Kales SN, Smith DL. Firefighting and the Heart: Implications for Prevention. *Circulation* 2017;**135**:1296–9. doi:10.1161/CIRCULATIONAHA.117.027018
- 7 Kales SN, Soteriades ES, Christoudias SG, *et al*. Firefighters and on-duty deaths from coronary heart disease: a case control study. *Environ Health Glob Access Sci Source* 2003;**2**:14. doi:10.1186/1476-069X-2-14
- 8 Korre M, Porto LGG, Farioli A, *et al*. Effect of Body Mass Index on Left Ventricular Mass in Career Male Firefighters. *Am J Cardiol* 2016;**118**:1769–73. doi:10.1016/j.amjcard.2016.08.058
- 9 Storer TW, Dolezal BA, Abrazado ML, *et al*. Firefighter health and fitness assessment: a call to action. *J Strength Cond Res Natl Strength Cond Assoc* 2014;**28**:661–71. doi:10.1519/JSC.0b013e31829b54da
- 10 Ode J, Knous J, Schlaff R, *et al*. Accuracy of body mass index in volunteer firefighters. *Occup Med Oxf Engl* 2014;**64**:193–7. doi:10.1093/occmed/kqt143
- 11 Porto LGG, Nogueira RM, Nogueira EC, *et al*. Agreement between BMI and body fat obesity definitions in a physically active population. *Arch Endocrinol Metab* 2016;**60**:515–25. doi:10.1590/2359-3997000000220
- 12 Strauß M, Foshag P, Przybyłek B, *et al*. Occupation and metabolic syndrome: is there correlation? A cross sectional study in different work activity occupations of German firefighters and office workers. *Diabetol Metab Syndr* 2016;**8**:57. doi:10.1186/s13098-016-0174-0
- 13 Jahnke SA, Poston WSC, Haddock CK, *et al*. Obesity and incident injury among career firefighters in the central United States. *Obes Silver Spring Md* 2013;**21**:1505–8. doi:10.1002/oby.20436

- 1  
2  
3 14 Poston WSC, Jitnarin N, Haddock CK, *et al.* Obesity and injury-related absenteeism in a  
4 population-based firefighter cohort. *Obes Silver Spring Md* 2011;**19**:2076–81.  
5 doi:10.1038/oby.2011.147  
6
- 7 15 Smith DL, Haller JM, Korre M, *et al.* Pathoanatomic Findings Associated With Duty-Related  
8 Cardiac Death in US Firefighters: A Case-Control Study. *J Am Heart Assoc* 2018;**7**:e009446.  
9 doi:10.1161/JAHA.118.009446  
10
- 11 16 Fahs CA, Smith DL, Horn GP, *et al.* Impact of excess body weight on arterial structure,  
12 function, and blood pressure in firefighters. *Am J Cardiol* 2009;**104**:1441–5.  
13 doi:10.1016/j.amjcard.2009.07.009  
14
- 15 17 Kappus RM, Fahs CA, Smith D, *et al.* Obesity and overweight associated with increased  
16 carotid diameter and decreased arterial function in young otherwise healthy men. *Am J*  
17 *Hypertens* 2014;**27**:628–34. doi:10.1093/ajh/hpt152  
18
- 19 18 Martin-Rodriguez E, Guillen-Grima F, Martí A, *et al.* Comorbidity associated with obesity in a  
20 large population: The APNA study. *Obes Res Clin Pract* 2015;**9**:435–47.  
21 doi:10.1016/j.orcp.2015.04.003  
22
- 23 19 Nogueira EC, Porto LGG, Nogueira RM, *et al.* Body Composition is Strongly Associated With  
24 Cardiorespiratory Fitness in a Large Brazilian Military Firefighter Cohort: The Brazilian  
25 Firefighters Study. *J Strength Cond Res* 2016;**30**:33–8. doi:10.1519/JSC.0000000000001039  
26
- 27 20 Lai C-C, Sun D, Cen R, *et al.* Impact of long-term burden of excessive adiposity and elevated  
28 blood pressure from childhood on adulthood left ventricular remodeling patterns: the Bogalusa  
29 Heart Study. *J Am Coll Cardiol* 2014;**64**:1580–7. doi:10.1016/j.jacc.2014.05.072  
30
- 31 21 De Lorenzo A, Noce A, Moriconi E, *et al.* MOSH Syndrome (Male Obesity Secondary  
32 Hypogonadism): Clinical Assessment and Possible Therapeutic Approaches. *Nutrients*  
33 2018;**10**. doi:10.3390/nu10040474  
34
- 35 22 Michalakis K, Mintziori G, Kaprara A, *et al.* The complex interaction between obesity,  
36 metabolic syndrome and reproductive axis: a narrative review. *Metabolism* 2013;**62**:457–78.  
37 doi:10.1016/j.metabol.2012.08.012  
38
- 39 23 Aune D, Sen A, Prasad M, *et al.* BMI and all cause mortality: systematic review and non-linear  
40 dose-response meta-analysis of 230 cohort studies with 3.74 million deaths among 30.3  
41 million participants. *BMJ* 2016;**353**:i2156.  
42
- 43 24 Cornell DJ, Gnacinski SL, Zamzow A, *et al.* Measures of health, fitness, and functional  
44 movement among firefighter recruits. *Int J Occup Saf Ergon JOSE* 2017;**23**:198–204.  
45 doi:10.1080/10803548.2016.1187001  
46
- 47 25 Roberts MA, O’Dea J, Boyce A, *et al.* Fitness levels of firefighter recruits before and after a  
48 supervised exercise training program. *J Strength Cond Res* 2002;**16**:271–7.  
49
- 50 26 Hollerbach BS, Jahnke SA, Poston WSC, *et al.* Examining a novel firefighter exercise training  
51 program on simulated fire ground test performance, cardiorespiratory endurance, and  
52 strength: a pilot investigation. *J Occup Med Toxicol Lond Engl* 2019;**14**:12.  
53 doi:10.1186/s12995-019-0232-2  
54
- 55  
56  
57  
58  
59  
60

- 1
- 2
- 3 27 Jeong KS, Zhou J, Griffin SC, *et al.* MicroRNA Changes in Firefighters. *J Occup Environ Med*
- 4 2018;**60**:469–74. doi:10.1097/JOM.0000000000001307
- 5
- 6 28 Tsismenakis AJ, Christophi CA, Burress JW, *et al.* The obesity epidemic and future
- 7 emergency responders. *Obes Silver Spring Md* 2009;**17**:1648–50. doi:10.1038/oby.2009.63
- 8
- 9 29 Ide CW. Fat future for firefighters? Changes in prevalence of obesity in Scottish local authority
- 10 firefighters. *Scott Med J* 2012;**57**:247. doi:10.1258/smj.2012.012114
- 11
- 12 30 Bonnell E, Huggins C, Huggins C, *et al.* Influences on Dietary Choices during Day versus
- 13 Night Shift in Shift Workers: A Mixed Methods Study. *Nutrients* 2017;**9**:193.
- 14 doi:10.3390/nu9030193
- 15
- 16 31 Kim M-J, Son K-H, Park H-Y, *et al.* Association between shift work and obesity among female
- 17 nurses: Korean Nurses' Survey. *BMC Public Health* 2013;**13**:1204. doi:10.1186/1471-2458-
- 18 13-1204
- 19
- 20 32 Antunes LC, Levandovski R, Dantas G, *et al.* Obesity and shift work: chronobiological
- 21 aspects. *Nutr Res Rev* 2010;**23**:155–68. doi:10.1017/S0954422410000016
- 22
- 23 33 Sun M, Feng W, Wang F, *et al.* Meta-analysis on shift work and risks of specific obesity types.
- 24 *Obes Rev Off J Int Assoc Study Obes* 2018;**19**:28–40. doi:10.1111/obr.12621
- 25
- 26 34 Soteriades ES, Hauser R, Kawachi I, *et al.* Obesity and cardiovascular disease risk factors in
- 27 firefighters: a prospective cohort study. *Obes Res* 2005;**13**:1756–63.
- 28 doi:10.1038/oby.2005.214
- 29
- 30 35 Elliot DL, Goldberg L, Kuehl KS, *et al.* The PHLAME (Promoting Healthy Lifestyles: Alternative
- 31 Models' Effects) firefighter study: outcomes of two models of behavior change. *J Occup*
- 32 *Environ Med* 2007;**49**:204–13. doi:10.1097/JOM.0b013e3180329a8d
- 33
- 34 36 Mozaffarian D, Hao T, Rimm EB, *et al.* Changes in diet and lifestyle and long-term weight
- 35 gain in women and men. *N Engl J Med* 2011;**364**:2392–404. doi:10.1056/NEJMoa1014296
- 36
- 37 37 Poston WSC, Haddock CK, Jahnke SA, *et al.* The prevalence of overweight, obesity, and
- 38 substandard fitness in a population-based firefighter cohort. *J Occup Environ Med*
- 39 2011;**53**:266–73. doi:10.1097/JOM.0b013e31820af362
- 40
- 41 38 Gurevich KG, Poston WSC, Anders B, *et al.* Obesity prevalence and accuracy of BMI-defined
- 42 obesity in Russian firefighters. *Occup Med Oxf Engl* 2017;**67**:61–3.
- 43 doi:10.1093/occmed/kqw136
- 44
- 45 39 Leischik R, Foshag P, Strauß M, *et al.* Aerobic Capacity, Physical Activity and Metabolic Risk
- 46 Factors in Firefighters Compared with Police Officers and Sedentary Clerks. *PLoS One*
- 47 2015;**10**:e0133113. doi:10.1371/journal.pone.0133113
- 48
- 49 40 Liberati A, Altman DG, Tetzlaff J, *et al.* The PRISMA statement for reporting systematic
- 50 reviews and meta-analyses of studies that evaluate healthcare interventions: explanation and
- 51 elaboration. *BMJ* 2009;**339**:b2700.
- 52
- 53
- 54
- 55
- 56
- 57
- 58
- 59
- 60

- 1  
2  
3 41 Shamseer L, Moher D, Clarke M, *et al*. Preferred reporting items for systematic review and  
4 meta-analysis protocols (PRISMA-P) 2015: elaboration and explanation. *BMJ*  
5 2015;**349**:g7647. doi:10.1136/bmj.g7647  
6  
7 42 Kanter R, Caballero B. Global gender disparities in obesity: a review. *Adv Nutr Bethesda Md*  
8 2012;**3**:491–8. doi:10.3945/an.112.002063  
9  
10 43 Garawi F, Devries K, Thorogood N, *et al*. Global differences between women and men in the  
11 prevalence of obesity: is there an association with gender inequality? *Eur J Clin Nutr*  
12 2014;**68**:1101–6. doi:10.1038/ejcn.2014.86  
13  
14 44 Poston WSC, Jitnarin N, Haddock CK, *et al*. Accuracy of self-reported weight, height and BMI  
15 in US firefighters. *Occup Med Oxf Engl* 2014;**64**:246–54. doi:10.1093/occmed/kqu040  
16  
17 45 Azabdaftari N, Amani R, Taha Jalali M. Biochemical and nutritional indices as cardiovascular  
18 risk factors among Iranian firefighters. *Ann Clin Biochem* 2009;**46**:385–9.  
19 doi:10.1258/acb.2009.009026  
20  
21 46 Boyle MH. Guidelines for evaluating prevalence studies. *Evid Based Ment Health* 1998;**1**:37–  
22 9. doi:10.1136/ebmh.1.2.37  
23  
24 47 Higgins JPT, Altman DG, Gøtzsche PC, *et al*. The Cochrane Collaboration's tool for assessing  
25 risk of bias in randomised trials. *BMJ* 2011;**343**:d5928.  
26  
27 48 Stang A. Critical evaluation of the Newcastle-Ottawa scale for the assessment of the quality  
28 of nonrandomized studies in meta-analyses. *Eur J Epidemiol* 2010;**25**:603–5.  
29 doi:10.1007/s10654-010-9491-z  
30  
31 49 Jüni P, Witschi A, Bloch R, *et al*. The hazards of scoring the quality of clinical trials for meta-  
32 analysis. *JAMA* 1999;**282**:1054–60.  
33  
34 50 Munn Z, Moola S, Lisy K, *et al*. Methodological guidance for systematic reviews of  
35 observational epidemiological studies reporting prevalence and cumulative incidence data.  
36 *Int J Evid Based Healthc* 2015;**13**:147–53. doi:10.1097/XEB.0000000000000054  
37  
38 51 Newcombe RG. Two-sided confidence intervals for the single proportion: comparison of  
39 seven methods. *Stat Med* 1998;**17**:857–72.  
40  
41  
42  
43  
44  
45  
46  
47  
48  
49  
50  
51  
52  
53  
54  
55  
56  
57  
58  
59  
60

## SUPPLEMENTARY FILE 1

| Eligibility Form – Please cross “yes” or “no” considering the content of the paper                                                     |     |    |
|----------------------------------------------------------------------------------------------------------------------------------------|-----|----|
|                                                                                                                                        | YES | NO |
| Does the study possess the main outcome of interest? (Obesity prevalence using BMI, %BF or WC)                                         |     |    |
| Does the study possess at least one group that may be analyzed or provide outcome of interest in which there are only firefighters in? |     |    |
| Are men and women in separate groups in the reported data?                                                                             |     |    |

*If all answers are yes, then the study is eligible.*

## SUPPLEMENTARY FILE 2

## Risk of bias assesment scale

|                                                                                                 | Yes                      | No                       | Unclear                  | Not applicable           |
|-------------------------------------------------------------------------------------------------|--------------------------|--------------------------|--------------------------|--------------------------|
| A. Was the sample frame appropriate to address the target population?                           | <input type="checkbox"/> | <input type="checkbox"/> | <input type="checkbox"/> | <input type="checkbox"/> |
| B. Were study participants sampled in an appropriate way?                                       | <input type="checkbox"/> | <input type="checkbox"/> | <input type="checkbox"/> | <input type="checkbox"/> |
| C. Was the sample size adequate?                                                                | <input type="checkbox"/> | <input type="checkbox"/> | <input type="checkbox"/> | <input type="checkbox"/> |
| D. Were the study subjects and the setting described in detail?                                 | <input type="checkbox"/> | <input type="checkbox"/> | <input type="checkbox"/> | <input type="checkbox"/> |
| E. Was the data analysis conducted with sufficient coverage of the identified sample?           | <input type="checkbox"/> | <input type="checkbox"/> | <input type="checkbox"/> | <input type="checkbox"/> |
| F. Were valid methods used for the identification of the condition?                             | <input type="checkbox"/> | <input type="checkbox"/> | <input type="checkbox"/> | <input type="checkbox"/> |
| G. Was the condition measure in a standard, reliable way for all participants?                  | <input type="checkbox"/> | <input type="checkbox"/> | <input type="checkbox"/> | <input type="checkbox"/> |
| H. Was there appropriate statistical analysis?                                                  | <input type="checkbox"/> | <input type="checkbox"/> | <input type="checkbox"/> | <input type="checkbox"/> |
| I. Was the response rate adequate, and if not, was the low response rate managed appropriately? | <input type="checkbox"/> | <input type="checkbox"/> | <input type="checkbox"/> | <input type="checkbox"/> |

# REPORTING CHECKLIST FOR PROTOCOL OF A SYSTEMATIC REVIEW.

## PRISMA-P (Preferred Reporting Items for Systematic review and Meta-Analysis Protocols)

### 2015 checklist: recommended items to address in a systematic review protocol

|                           |     | Reporting Item                                                                                                                                                                                  | Page Number |
|---------------------------|-----|-------------------------------------------------------------------------------------------------------------------------------------------------------------------------------------------------|-------------|
| Identification            | #1a | Identify the report as a protocol of a systematic review                                                                                                                                        | 1           |
| Update                    | #1b | If the protocol is for an update of a previous systematic review, identify as such                                                                                                              | N/A         |
|                           | #2  | If registered, provide the name of the registry (such as PROSPERO) and registration number                                                                                                      | 3           |
| Contact                   | #3a | Provide name, institutional affiliation, e-mail address of all protocol authors; provide physical mailing address of corresponding author                                                       | 8           |
| Contribution              | #3b | Describe contributions of protocol authors and identify the guarantor of the review                                                                                                             | 13          |
|                           | #4  | If the protocol represents an amendment of a previously completed or published protocol, identify as such and list changes; otherwise, state plan for documenting important protocol amendments | N/A         |
| Sources                   | #5a | Indicate sources of financial or other support for the review                                                                                                                                   | 13-14       |
| Sponsor                   | #5b | Provide name for the review funder and / or sponsor                                                                                                                                             | 13-14       |
| Role of sponsor or funder | #5c | Describe roles of funder(s), sponsor(s), and / or institution(s), if any, in developing the protocol                                                                                            | N/A         |
| Rationale                 | #6  | Describe the rationale for the review in the context of what is already known                                                                                                                   | 5-7         |
| Objectives                | #7  | Provide an explicit statement of the question(s) the review will address with reference to participants, interventions, comparators, and outcomes (PICO)                                        | 7           |

|    |                                         |      |                                                                                                                                                                                                                               |       |
|----|-----------------------------------------|------|-------------------------------------------------------------------------------------------------------------------------------------------------------------------------------------------------------------------------------|-------|
| 1  | Eligibility criteria                    | #8   | Specify the study characteristics (such as PICO, study design, setting, time frame) and report characteristics (such as years considered, language, publication status) to be used as criteria for eligibility for the review | 9,11  |
| 2  |                                         |      |                                                                                                                                                                                                                               |       |
| 3  |                                         |      |                                                                                                                                                                                                                               |       |
| 4  |                                         |      |                                                                                                                                                                                                                               |       |
| 5  |                                         |      |                                                                                                                                                                                                                               |       |
| 6  |                                         |      |                                                                                                                                                                                                                               |       |
| 7  |                                         |      |                                                                                                                                                                                                                               |       |
| 8  | Information sources                     | #9   | Describe all intended information sources (such as electronic databases, contact with study authors, trial registers or other grey literature sources) with planned dates of coverage                                         | 8-10  |
| 9  |                                         |      |                                                                                                                                                                                                                               |       |
| 10 |                                         |      |                                                                                                                                                                                                                               |       |
| 11 |                                         |      |                                                                                                                                                                                                                               |       |
| 12 |                                         |      |                                                                                                                                                                                                                               |       |
| 13 | Search strategy                         | #10  | Present draft of search strategy to be used for at least one electronic database, including planned limits, such that it could be repeated                                                                                    | 8     |
| 14 |                                         |      |                                                                                                                                                                                                                               |       |
| 15 |                                         |      |                                                                                                                                                                                                                               |       |
| 16 |                                         |      |                                                                                                                                                                                                                               |       |
| 17 |                                         |      |                                                                                                                                                                                                                               |       |
| 18 | Study records - data management         | #11a | Describe the mechanism(s) that will be used to manage records and data throughout the review                                                                                                                                  | 9-10  |
| 19 |                                         |      |                                                                                                                                                                                                                               |       |
| 20 |                                         |      |                                                                                                                                                                                                                               |       |
| 21 |                                         |      |                                                                                                                                                                                                                               |       |
| 22 | Study records - selection process       | #11b | State the process that will be used for selecting studies (such as two independent reviewers) through each phase of the review (that is, screening, eligibility and inclusion in meta-analysis)                               | 9-10  |
| 23 |                                         |      |                                                                                                                                                                                                                               |       |
| 24 |                                         |      |                                                                                                                                                                                                                               |       |
| 25 |                                         |      |                                                                                                                                                                                                                               |       |
| 26 |                                         |      |                                                                                                                                                                                                                               |       |
| 27 |                                         |      |                                                                                                                                                                                                                               |       |
| 28 |                                         |      |                                                                                                                                                                                                                               |       |
| 29 | Study records - data collection process | #11c | Describe planned method of extracting data from reports (such as piloting forms, done independently, in duplicate), any processes for obtaining and confirming data from investigators                                        | 9-10  |
| 30 |                                         |      |                                                                                                                                                                                                                               |       |
| 31 |                                         |      |                                                                                                                                                                                                                               |       |
| 32 |                                         |      |                                                                                                                                                                                                                               |       |
| 33 |                                         |      |                                                                                                                                                                                                                               |       |
| 34 | Data items                              | #12  | List and define all variables for which data will be sought (such as PICO items, funding sources), any pre-planned data assumptions and simplifications                                                                       | 10-11 |
| 35 |                                         |      |                                                                                                                                                                                                                               |       |
| 36 |                                         |      |                                                                                                                                                                                                                               |       |
| 37 |                                         |      |                                                                                                                                                                                                                               |       |
| 38 |                                         |      |                                                                                                                                                                                                                               |       |
| 39 |                                         |      |                                                                                                                                                                                                                               |       |
| 40 | Outcomes and prioritization             | #13  | List and define all outcomes for which data will be sought, including prioritization of main and additional outcomes, with rationale                                                                                          | 10-11 |
| 41 |                                         |      |                                                                                                                                                                                                                               |       |
| 42 |                                         |      |                                                                                                                                                                                                                               |       |
| 43 |                                         |      |                                                                                                                                                                                                                               |       |
| 44 |                                         |      |                                                                                                                                                                                                                               |       |
| 45 | Risk of bias in individual studies      | #14  | Describe anticipated methods for assessing risk of bias of individual studies, including whether this will be done at the outcome or study level, or both; state how this information will be used in data synthesis          | 11-12 |
| 46 |                                         |      |                                                                                                                                                                                                                               |       |
| 47 |                                         |      |                                                                                                                                                                                                                               |       |
| 48 |                                         |      |                                                                                                                                                                                                                               |       |
| 49 |                                         |      |                                                                                                                                                                                                                               |       |
| 50 |                                         |      |                                                                                                                                                                                                                               |       |
| 51 |                                         |      |                                                                                                                                                                                                                               |       |
| 52 | Data synthesis                          | #15a | Describe criteria under which study data will be quantitatively synthesised                                                                                                                                                   | 12-13 |
| 53 |                                         |      |                                                                                                                                                                                                                               |       |
| 54 |                                         |      |                                                                                                                                                                                                                               |       |
| 55 |                                         |      |                                                                                                                                                                                                                               |       |
| 56 |                                         | #15b | If data are appropriate for quantitative synthesis, describe planned summary measures, methods of handling data and methods of combining data from studies, including any                                                     | N/A   |
| 57 |                                         |      |                                                                                                                                                                                                                               |       |
| 58 |                                         |      |                                                                                                                                                                                                                               |       |
| 59 |                                         |      |                                                                                                                                                                                                                               |       |
| 60 |                                         |      |                                                                                                                                                                                                                               |       |

planned exploration of consistency (such as I<sup>2</sup>, Kendall's  $\tau$ )

|    |               |                                                                 |       |
|----|---------------|-----------------------------------------------------------------|-------|
| 1  |               |                                                                 |       |
| 2  |               |                                                                 |       |
| 3  | #15c          | Describe any proposed additional analyses (such as              | N/A   |
| 4  |               | sensitivity or subgroup analyses, meta-regression)              |       |
| 5  |               |                                                                 |       |
| 6  | #15d          | If quantitative synthesis is not appropriate, describe the type | 12-13 |
| 7  |               | of summary planned                                              |       |
| 8  |               |                                                                 |       |
| 9  |               |                                                                 |       |
| 10 | Meta-bias(es) | #16 Specify any planned assessment of meta-bias(es) (such as    | N/A   |
| 11 |               | publication bias across studies, selective reporting within     |       |
| 12 |               | studies)                                                        |       |
| 13 |               |                                                                 |       |
| 14 |               |                                                                 |       |
| 15 | Confidence in | #17 Describe how the strength of the body of evidence will be   | N/A   |
| 16 | cumulative    | assessed (such as GRADE)                                        |       |
| 17 | evidence      |                                                                 |       |
| 18 |               |                                                                 |       |
| 19 |               |                                                                 |       |

The PRISMA-P checklist is distributed under the terms of the Creative Commons Attribution License CC-BY 4.0. This checklist was completed on 20. March 2019 using <https://www.goodreports.org/>, a tool made by the [EQUATOR Network](#) in collaboration with [Penelope.ai](#)
