# Supplementary material for: Worldwide prevalence of obesity among firefighters: a systematic review protocol
Source: PubMed Central journal article supplement — BMJ Open. 2020 Jan 9;10(1):e031282. doi: 10.1136/bmjopen-2019-031282 (PMC6955470; doi:10.1136/bmjopen-2019-031282), 2020-01-09
Supplement: bmjopen-2019-031282supp001.pdf [file bmjopen-2019-031282supp001.pdf]

## SUPPLEMENTARY FILE 1

| <b>Eligibility Form – Please cross “yes” or “no” considering the content of the paper</b>                                              |            |           |
|----------------------------------------------------------------------------------------------------------------------------------------|------------|-----------|
|                                                                                                                                        | <b>YES</b> | <b>NO</b> |
| Does the study possess the main outcome of interest? (Obesity prevalence using BMI, %BF or WC)                                         |            |           |
| Does the study possess at least one group that may be analyzed or provide outcome of interest in which there are only firefighters in? |            |           |
| Are men and women in separate groups in the reported data?                                                                             |            |           |

*If all answers are yes, then the study is eligible.*
